# Supplementary material
Source: publisher figshare collection journal article supplement (https://iop.figshare.com/ndownloader/files/20271459)
Supplement: Supplementary file 1 [file 20271459]

## Sheet: Supp Table 1 Survey results
				Field plot data															Interview Data
Index	Plot ID	Start date and time	End date and time	Plot Center Point latitude	Plot Center Point longitude	Plot Center Point Altitude	Plot Center Point Precision	Current Land Use / Land Cover	% canopy cover > 3 metres	Tallest tree height (m)	Average tree height (m)	Is there visible evidence of farming in the main plot?	What crops or residues can be seen?	Is there visible evidence of charcoal making in the main plot?	Is there visible evidence of charcoal making within the extended plot?	Is there visible evidence of grazing in the main plot?	Is there visible evidence of grazing in the extended plot?	Is there visible evidence of fire in the main plot?	What type of land is this?	What was the land tenure when it was cleared?	In what year were most of the trees cut?	Which of the following was the primary reason that the area was cleared?	Was charcoal produced from the trees since 2010?	Was the area farmed since 2010?	Which of the following other activities were done in the area since 2010?	Which, if any, crops were planted?	Were the crops planted for subsistence, cash, or both?	What wood products were harvested?	Could this area currently be considered a fallow?	How many years will it be left fallow?	Did the people involved in clearing establish some kind of right of occupancy?	What was the gender(s) of those involved in clearing?	Age of youngest person involved in clearing	Age of oldest person involved in clearing	Did those involved in clearing own other farmland?	Did they live in this village?	Where they born in their current village?	How long have they lived in their current village?	Did they move from another district?	Which district did they move from?	Why did they move?	Remarks about the area
1	63B	2018-07-25T10:58:35.821+03	2018-07-25T19:15:21.843+03	-8.85318	39.3769	43.1	1.75	Annual Crops	Less than 10%	2	2	tillage Crops or Residues	sorghum	No evidence of charcoal making	No evidence of charcoal making	No evidence of grazing	No evidence of grazing	Yes	General Land	General Land	2015	to create a farm	No	Yes	natural or accidental fire none	sorghum	food		No		Yes	male	50	50	Yes	No	No	3	No		Better farming land	In the south of the plot there is secondary forest. Wild animal dung. Wild pig.
2	40	2018-07-24T09:54:26.922+03	2018-07-24T10:18:01.320+03	-7.91583	38.878	32	1.5	Annual Crops	Less than 10%	5	5	Crops or Residues	sesame	No evidence of charcoal making	Charcoal Kiln or Scar	Livestock dung Other Evidence	Livestock dung	Yes	Village Land	Communal	2016	to make charcoal	Yes	No	harvesting wood products other than charcoal grazing building a residential or commercial dwelling other			cooking wood building poles	No		No	male	25	45	No	No	No	6	Yes	Kibiti. Mbeya, Iringa, Morogoro	Economic Opportunity	New settlement and farming
3	70	2018-07-24T13:28:51.030+03	2018-07-24T13:42:52.803+03	-8.3194	39.0527	212.4	1.5	Annual Crops	Less than 10%	0	0	tillage Crops or Residues	orchard sorghum	No evidence of charcoal making	No evidence of charcoal making	No evidence of grazing	No evidence of grazing	Yes	Village Land	Communal	2015	to create a farm	Yes	Yes	none	sorghum	food		No		Yes	male	15	50	No	Yes	Yes					Farming area. Cultivated last farming season
4	10	2018-07-23T13:21:51.979+03	2018-07-23T15:55:17.615+03	-7.60806	38.9482	246.8	3.8	Grassland	Less than 10%	0	0	Crops or Residues	cassava	Charcoal Kiln or Scar	No evidence of charcoal making	No evidence of grazing	No evidence of grazing	Yes	Village Land	Customary Right of Occupancy	2015	to create a farm	Yes	Yes	harvesting wood products other than charcoal natural or accidental fire	cassava sesame unknown	food cash	cooking wood	Yes	1	Yes	male female	25	55	Yes	Yes	No	10	Yes	Mwanza	Economic Opportunity	Area surrounded by cassava farm.
5	80	2018-07-25T14:56:05.882+03	2018-07-25T15:10:06.018+03	-9.51295	39.5093	29.9	2.1	Bushland	Less than 10%	15	15	No evidence of farming		No evidence of charcoal making	No evidence of charcoal making	Livestock dung Grazed grass or foliage in the plot	Livestock dung Grazed grass or foliage in the plot	No	Village Land	Communal	2011	unknown	Unknown	Yes	grazing	other	unknown		No													Poor regeneration, cleared arround seven to ten years ago. There are some trees indicating that the area has been cleared. Boros africana seen. Most of the area covered in herbs.
6	87	2018-07-26T14:00:57.432+03	2018-07-26T14:12:51.366+03	-8.46853	38.9727	357.8	2.4	Woody Regeneration	Less than 10%	4	2	No evidence of farming		No evidence of charcoal making	No evidence of charcoal making	No evidence of grazing	No evidence of grazing	Yes	Village Land	Communal	2014	to create a farm	No	Yes	harvesting wood products other than charcoal natural or accidental fire	rice	food	building poles	Yes	4												Dry log. It has been fallow for about 5 years. The plot is located on a steep slope. Dryland rice was cultivated 4 years ago. Lots of thorny, thick scrub. Could be the reason why it was farmed and left.
7	3	2018-07-27T13:10:38.294+03	2018-07-27T13:25:10.237+03	-9.58762	39.3465	85.7	2.1	Young Forest	Between 10% and 40%	15	4	vegetation clearing		No evidence of charcoal making	No evidence of charcoal making	No evidence of grazing	No evidence of grazing	Yes	Village Land	Communal	2014	to create a farm	No	Yes	harvesting wood products other than charcoal	sesame	cash	timber	No													Area deforested about 5 yrs ago. Standing dead trees.
8	16	2018-07-27T16:49:35.660+03	2018-07-27T17:07:46.888+03	-9.8145	39.6287	71.9	1.8	Annual Crops	Less than 10%	18	5	tillage Crops or Residues	cowpeas sorghum	No evidence of charcoal making	No evidence of charcoal making	No evidence of grazing	No evidence of grazing	Yes	Village Land	Customary Right of Occupancy	2015	to create a farm	Unknown	Yes	none	cowpeas sorghum	unknown		No													Sorghum farm. Plot surrounded by maize farms and sorghum.
9	79	2018-07-28T10:38:02.676+03	2018-07-28T11:09:25.615+03	-10.5412	40.0996	162.1	1.8	Woody Regeneration	Less than 10%	2.5	2.5	tillage vegetation clearing Crops or Residues	cashew cassava	No evidence of charcoal making	No evidence of charcoal making	No evidence of grazing	No evidence of grazing	Yes	Village Land	Customary Right of Occupancy	2012	to create a farm	No	Yes	harvesting wood products other than charcoal	cashew cassava cowpeas	food cash	cooking wood building poles	No		No	male female	40	60	No	Yes	Yes					The area is owned by a teacher. It is not a fallow land but full of weeds with many young cashewnut trees.
10	5	2018-07-29T11:18:32.030+03	2018-07-29T11:43:14.265+03	-9.84338	39.1058	297.6	1.8	Annual Crops	Less than 10%	8	8	vegetation clearing Crops or Residues	sesame	No evidence of charcoal making	No evidence of charcoal making	No evidence of grazing	No evidence of grazing	Yes	Village Land	Communal	2016	to create a farm	No	Yes	harvesting wood products other than charcoal natural or accidental fire	sesame	cash	cooking wood building poles	No		No	male female	32	55	Yes	No	No	3	No		Better farming land	The area is currently used for sesame farming though it was planned for grazing. There are settlements nearby the plot. There also residual tall trees which were burnt to create the farm. And some residuals of tomato crop.
11	14	2018-07-30T10:51:51.793+03	2018-07-30T11:30:37.236+03	-10.4238	38.8712	358	1.75	Grassland	Less than 10%	0	0	vegetation clearing Crops or Residues	cashew cassava	No evidence of charcoal making	No evidence of charcoal making	No evidence of grazing	No evidence of grazing	Yes	Village Land	Communal	2017	to create a farm	No	Yes	natural or accidental fire	cashew cassava	food cash		No		Yes	male	32	40	No	No	No	4	Yes	Newala	Economic Opportunity Better farming land	The current owner has inherited the land plus some cashew farm and he keeps expanding. It is a typical farm of cashew nut though there are still some trees around it which probably might be cleared soon for farm expansion
12	25	2018-07-30T14:31:02.732+03	2018-07-30T14:58:22.843+03	-10.4425	38.1947	392	2.4	Grassland	Less than 10%	3	2	No evidence of farming		No evidence of charcoal making	No evidence of charcoal making	No evidence of grazing	No evidence of grazing	Yes	Village Land	Wildlife Management Area	2017	to create a farm	No	Yes	driving off wild animals natural or accidental fire	sesame	cash		No													This area was set as Ndonda Wildlife Management Area hence people around this area burnt trees and grass to flush out wild animals and also for hunting. At the same time they encroach to prepare land for sesame farms.
13	42	2018-07-31T09:06:15.138+03	2018-07-31T09:56:13.199+03	-10.24	38.8583	454	2.7	Annual Crops	Less than 10%	2	2	vegetation clearing Crops or Residues	cowpeas sorghum	No evidence of charcoal making	No evidence of charcoal making	No evidence of grazing	No evidence of grazing	No	Village Land	Communal	2015	to create a farm	No	Yes	natural or accidental fire none	cowpeas maize sorghum	food cash		Yes	1												The area is currently under fallow and mainly used for farming. There some growing (regenerating) trees in the plot. Since the village got no land use plan probably the owner might expand the land as there some farms around it regardless of it been in between trees.
14	23	2018-07-31T12:15:12.224+03	2018-07-31T12:33:42.070+03	-10.0728	38.5304	252.6	1.75	Annual Crops	Less than 10%	2	1.7	Crops or Residues	cowpeas maize sorghum	No evidence of charcoal making	No evidence of charcoal making	No evidence of grazing	No evidence of grazing	No	Village Land	Communal	2014	to create a farm	No	Yes	natural or accidental fire	cowpeas maize sorghum	food		No		Yes	male female	25	55	Yes	Yes	Yes					The area is commonly used for agriculture since 4 years past. No land use plan here, so business of clearing land for farm will continue (he said he will expand to the nearby area around here).
15	90	2018-08-01T10:57:22.004+03	2018-08-01T11:18:39.805+03	-9.82787	38.0162	454.2	1.8	Annual Crops	Less than 10%	12	2	vegetation clearing Crops or Residues	cashew maize	No evidence of charcoal making	No evidence of charcoal making	No evidence of grazing	No evidence of grazing	Yes	Village Land	Customary Right of Occupancy	2013	to create a farm	No	Yes	natural or accidental fire	cashew maize sorghum	food cash		No		Yes	male	18	40	Yes	Yes	Yes					Area opened for for cashwenut but last year planted sorghum and maize. There is a path. Lots of logs and stumps.
16	44	2018-08-01T15:09:14.004+03	2018-08-01T15:22:09.426+03	-10.0447	38.4791	291.8	1.8	Annual Crops	Less than 10%	0	0	vegetation clearing Crops or Residues	cowpeas sorghum	No evidence of charcoal making	No evidence of charcoal making	No evidence of grazing	No evidence of grazing	No	Village Land	Communal	2011	to create a farm	No	Yes	harvesting wood products other than charcoal	maize sesame sorghum	food cash	cooking wood	No		Yes	male female	18	41	No	Yes	No	7	Yes	Masasi	Economic Opportunity Better farming land	Near the plot there are two houses.
17	21	2018-08-02T10:49:02.467+03	2018-08-02T10:59:22.951+03	-9.84626	38.4978	289	1.75	Woody Regeneration	Less than 10%	13	4	Stumps		No evidence of charcoal making	No evidence of charcoal making	No evidence of grazing	No evidence of grazing	Yes	Village Land	Customary Right of Occupancy	2015	to create a farm	No	Yes	none	sesame	cash		No													The land was cultivated over the last three years. Currently burnt.
18	95	2018-08-03T10:17:01.369+03	2018-08-03T10:52:48.057+03	-11.3705	38.4562	174	2.1	Annual Crops	Less than 10%	2	2	Crops or Residues	cowpeas	No evidence of charcoal making	No evidence of charcoal making	Livestock dung	Livestock dung	Yes	Village Land	Customary Right of Occupancy	2014	to create a farm	No	Yes	harvesting wood products other than charcoal grazing natural or accidental fire	cowpeas maize sesame	food cash	cooking wood	No		Yes	male female	41	51	No	Yes	Yes					The area is abandoned. Unsure if the person who cleared the area will come back again. Completely cleared in 2014. It is surrounded by forest and has regenerating trees in it. Mang'ati people practice livestock grazing in the area
19	85	2018-08-04T11:07:44.977+03	2018-08-04T12:22:34.477+03	-10.6201	37.8676	424.4	2.1	Annual Crops	Less than 10%	1	1	Crops or Residues	cowpeas maize	No evidence of charcoal making	No evidence of charcoal making	No evidence of grazing	No evidence of grazing	Yes	Village Land	Customary Right of Occupancy	2014	to create a farm	No	Yes	harvesting wood products other than charcoal natural or accidental fire	cashew cowpeas maize	food cash	cooking wood building poles	No		Yes	male female	26	28	Yes	Yes	Yes					There is a footpath in the plot, tree stumps and young cashew trees less than 1m. The area is still used as a farm.
20	38	2018-08-04T16:19:40.439+03	2018-08-04T17:18:01.090+03	-11.1647	37.3533	619.7	1.5	Woody Regeneration	Less than 10%	12	3	No evidence of farming		Charcoal Kiln or Scar	Charcoal Kiln or Scar	No evidence of grazing	No evidence of grazing	Yes	Village Land	Customary Right of Occupancy	2011	to create a farm	Yes	Yes	harvesting wood products other than charcoal natural or accidental fire	maize	food	cooking wood	No													The rate of regeneration is high.
21	9	2018-08-06T12:23:26.034+03	2018-08-06T12:43:32.197+03	-10.8581	36.0226	724.8	1.5	Annual Crops	Less than 10%	0	0	Terraces		No evidence of charcoal making	No evidence of charcoal making	No evidence of grazing	No evidence of grazing	Yes	Village Land	Customary Right of Occupancy	2016	to create a farm	No	Yes	natural or accidental fire	sesame	cash		No		Yes	male female	45	52	No	No	No	0	No		Land Shortage Economic Opportunity	It is a cleared area near River Mkonde. There is an irrigation scheme near to the plot. It is also surrounded by forest.
22	113	2018-08-07T10:34:49.211+03	2018-08-07T14:06:20.413+03	-10.5429	35.5256	1056.9	1.8	Annual Crops	Less than 10%	9	9	Crops or Residues	cowpeas maize	No evidence of charcoal making	No evidence of charcoal making	No evidence of grazing	No evidence of grazing	Yes	Village Land	Customary Right of Occupancy	2015	to create a farm	Unknown	Yes	natural or accidental fire	cowpeas maize	unknown		No		Yes	male	25	30	Unknown	No	Unknown					Only one tree of 9m in height. Area closed to the village forest. Crops have yet to be harvested.
23	30	2018-08-07T13:42:47.704+03	2018-08-07T14:07:24.738+03	-10.7825	35.4613	981.2	1.8	Grassland	Less than 10%	0	0	Crops or Residues	Mango trees	Charcoal Kiln or Scar	Charcoal Kiln or Scar	No evidence of grazing	No evidence of grazing	No	Village Land	Communal	2014	to create a farm	Yes	Yes	harvesting wood products other than charcoal natural or accidental fire	mango trees	cash	timber building poles	No		Yes	male	27	45	No	No	No	4	Yes	Mbeya, dsm and mwanza	Economic Opportunity	Large scale mango farm owned by Somango company limited.
24	77	2018-08-08T12:38:11.462+03	2018-08-08T12:56:03.560+03	-11.0107	35.5109	967.7	2	Annual Crops	Less than 10%	1.5	1.5	tillage vegetation clearing Crops or Residues	beans	No evidence of charcoal making	No evidence of charcoal making	No evidence of grazing	No evidence of grazing	Yes	Village Land	Communal	2015	to create a farm	No	Yes	other	beans	food		No		Yes	male female	45	50	Yes	Yes	No	10	Yes	Mbinga	Better farming land	Mostly burnt logs after tree cuting during the farm preparation. Close to the plot there is forest that possibly will be cleared soon.
25	103	2018-08-08T13:48:39.188+03	2018-08-08T13:58:48.198+03	-11.0276	35.4676	895.8	1.75	Annual Crops	Less than 10%	15	15	Crops or Residues	cowpeas maize sorghum	No evidence of charcoal making	Charcoal Kiln or Scar	No evidence of grazing	No evidence of grazing	Yes	Village Land	Communal	2008	to create a farm	Yes	Yes	harvesting wood products other than charcoal	cowpeas maize sorghum	food cash	cooking wood building poles	No		No	male female	32	36	Yes	Yes	No	16	No		Better farming land	It’s a farm with only one tree.
26	24	2018-08-09T12:08:00.503+03	2018-08-09T17:34:27.915+03	-10.5372	34.8565	1144.4	2.1	Annual Crops	Less than 10%	15	2.5	Crops or Residues	maize	No evidence of charcoal making	No evidence of charcoal making	No evidence of grazing	No evidence of grazing	No	Village Land	Customary Right of Occupancy	1995	to create a farm	No	Yes	harvesting wood products other than charcoal	maize finger millet	food	cooking wood building poles	No		No	male female	20	25	Yes	Yes	Yes					Farm with only two tall trees.
27	91	2018-08-09T17:14:03.204+03	2018-08-10T05:42:38.710+03	-10.7396	34.8429	1231.5	1.5	Annual Crops	Less than 10%	5.5	5.5	Crops or Residues	maize	No evidence of charcoal making	No evidence of charcoal making	No evidence of grazing	No evidence of grazing	Yes	Village Land	Customary Right of Occupancy	2013	to create a farm	Unknown	Yes	harvesting wood products other than charcoal	beans maize finger millet	food cash	cooking wood	No													Farm land there is only one tree
28	71	2018-08-09T19:30:53.430+03	2018-08-10T05:43:20.416+03	-10.6512	34.7109	1316	2.1	Annual Crops	Less than 10%	0	0	Crops or Residues	banana beans maize	No evidence of charcoal making	No evidence of charcoal making	No evidence of grazing	No evidence of grazing	Yes	Reserved Land	Forest Reserve	2015	to create a farm	Unknown	Yes	harvesting wood products other than charcoal	maize	food	cooking wood	No		Yes	male	52	52	Yes	Yes	No	8	Yes	Mbinga to Nyasa	Better farming land	Area located in Nyasa district and it is in Livingstone Forest Reserve.
29	65	2018-08-10T16:49:15.856+03	2018-08-10T17:19:12.656+03	-9.33692	34.0464	2078.3	1.5	Annual Crops	Less than 10%	16	4	tillage Crops or Residues	maize Pigeon peas and potatoes	No evidence of charcoal making	No evidence of charcoal making	No evidence of grazing	No evidence of grazing	No	Village Land	Customary Right of Occupancy	2013	to create a farm	No	Yes	Pine seedlings	maize pigeon peas	food		No		Yes	male female	0	0	No	Yes	Yes					There is settlement near the plot. Bamboo, Macaranga sp and Hagenia species were the dominant spp of this area.
30	66	2018-08-13T11:39:07.640+03	2018-08-13T18:24:48.582+03	-7.18826	35.9725	881.8	2.1	Annual Crops	Less than 10%	2	1.5	Crops or Residues	sorghum	No evidence of charcoal making	No evidence of charcoal making	Livestock dung Grazed grass or foliage in the plot	Livestock dung Grazed grass or foliage in the plot	Yes	Village Land	Communal	2016	to create a farm	No	Yes	grazing	sorghum	food		No		No	male	14	50	Yes	Yes	Yes					Soil is not suitable for farming. There are signs of regeneration on the south west side of the plot.
31	76c	2018-08-13T18:15:21.255+03	2018-08-13T18:34:42.267+03	-7.66782	35.2965	924.4	1.5	Annual Crops	Less than 10%	8.2	1	Crops or Residues	maize groundnuts	No evidence of charcoal making	No evidence of charcoal making	Livestock dung	Livestock dung	Yes	Village Land	Communal	2015	to create a farm	Yes	Yes	grazing	ground nut	cash		No													Still a farm and grazing. Many burnt tree stumps.
32	96	2018-08-15T10:06:32.937+03	2018-08-15T10:19:48.093+03	-9.03339	36.1562	341.5	2.1	Annual Crops	Less than 10%	8	8	Crops or Residues	rice	No evidence of charcoal making	No evidence of charcoal making	Livestock dung	Livestock dung	Yes	Village Land	Customary Right of Occupancy	2015	to create a farm	No	Yes	harvesting wood products other than charcoal grazing natural or accidental fire	rice	food cash	cooking wood building poles	No													There is only one live tree and some dead standing trees in the plot. Several stumps and burnt logs on the ground.
33	82	2018-08-15T12:09:51.531+03	2018-08-15T16:09:20.465+03	-8.99497	36.1731	322.5	2.1	Annual Crops	Less than 10%	0	0	Crops or Residues	maize rice	No evidence of charcoal making	No evidence of charcoal making	Livestock seen within the vicinity of the plot Livestock dung	Livestock seen within the vicinity of the plot Livestock dung	Yes	Village Land	Communal	2014	to create a farm	Yes	Yes	harvesting wood products other than charcoal grazing natural or accidental fire	rice	food cash	cooking wood building poles	No		Yes	male female	18	36	No	No	No	4	No		Better farming land	The plot is now used for farming and has no trees inside. There are burnt stumps.
34	94	2018-08-15T15:45:41.566+03	2018-08-15T16:05:19.467+03	-8.99607	36.234	343.2	1.8	Annual Crops	Less than 10%	7.5	7.5	Crops or Residues	cowpeas maize sesame	No evidence of charcoal making	No evidence of charcoal making	Livestock dung	No evidence of grazing	Yes	Village Land	Customary Right of Occupancy	2011	to create a farm	No	Yes	harvesting wood products other than charcoal natural or accidental fire	cowpeas maize sesame	food cash	cooking wood building poles	No		No	male	0	0	Yes	Yes	No	0	No		Better farming land	There are two trees in the plot, a footpath nearby and is currently used for farming.
35	4b	2018-08-14T10:14:26.921+03	2018-08-14T10:55:31.281+03	-7.30432	36.9455	619.5	1.5	Young Forest	Between 10% and 40%	8	5	No evidence of farming		Charcoal Kiln or Scar	Charcoal Kiln or Scar	Livestock dung	Livestock dung Grazed grass or foliage in the plot	Yes	Village Land	Communal	2008	to make charcoal	Yes	No	harvesting wood products other than charcoal grazing			cooking wood building poles	No		Yes	male female	35	50	Unknown	No	No	10	Yes	Morogoro	Better farming land	They have started to cut trees again for farm clearance this year. Village Council have already told them to stop farming. Enforcement process ongoing. There are new fresh stumps and logs in the other part of the plot.
36	37	2018-08-16T11:56:13.201+03	2018-08-16T12:07:39.360+03	-8.3512	36.7215	345.8	2.1	Young Forest	Between 10% and 40%	10	5	No evidence of farming		Charcoal Kiln or Scar	Charcoal Kiln or Scar	Livestock dung	Livestock dung	No	Village Land	Customary Right of Occupancy	2015	to create a farm	Yes	Yes	harvesting wood products other than charcoal grazing	No crops planted	unknown	cooking wood building poles	No													There are three charcoal kilns around the plot and one in the plot. The plot is now cleared to prepare a farm so they made charcoal out of the cut trees.
37	52	2018-08-17T15:36:27.122+03	2018-08-17T16:03:24.127+03	-6.91297	37.9127	483.8	2.7	Woody Regeneration	Less than 10%	2	2	Crops or Residues	rice	No evidence of charcoal making	No evidence of charcoal making	No evidence of grazing	No evidence of grazing	Yes	Reserved Land	Central government Forest Reserve	2016	to create a farm	No	Yes	none	No crops planted	unknown		Yes	2												Plot is located within Kungwe Forest Reserve. Near the plot there is a small thatched house. Still some logs in the plot and lots of grass.
38	2	2018-08-20T12:25:09.038+03	2018-08-20T12:35:29.437+03	-6.84693	38.486	69.1	1.8	Woody Regeneration	Less than 10%	14	2	No evidence of farming		Charcoal Kiln or Scar	Charcoal Kiln or Scar	Livestock dung Grazed grass or foliage in the plot	Livestock dung Grazed grass or foliage in the plot	No	Village Land	Communal	2016	to make charcoal	Yes	No	harvesting wood products other than charcoal grazing			cooking wood building poles	No													Area cleared because of charcoal. Other activity is grazing
39	68b	2018-08-18T15:19:35.278+03	2018-08-18T15:26:38.494+03	-6.82117	37.3331	412.7	2.1	Grassland	Less than 10%	0	0	No evidence of farming		Charcoal Kiln or Scar	Charcoal Kiln or Scar	Livestock seen within the vicinity of the plot	Livestock seen within the vicinity of the plot	No	General Land	Leased	2017	to make charcoal	Yes	No	grazing				No													Area cleared for charcoal and grazing. No single tree. Only stumps remain in the plot. This is in the Maya ranch.
40	120	2018-08-21T14:47:51.069+03	2018-08-21T15:06:36.435+03	-7.25805	38.8798	213.5	1.25	Annual Crops	Less than 10%	3	3	Crops or Residues	cowpeas maize rice sesame	No evidence of charcoal making	Charcoal Kiln or Scar	Livestock seen within the vicinity of the plot Livestock dung	Livestock seen within the vicinity of the plot Livestock dung	Yes	Village Land	Communal	2013	to create a farm	Yes	Yes	grazing natural or accidental fire	cowpeas maize rice sesame	food cash		No													High level of deforestation. Only one tree in the plot. According to the Village Chairperson, the area belongs to Mkuranga district. Currently the area is used as a farm. Temporary settlement near the plot
41	46	2018-08-24T12:20:46.040+03	2018-08-24T16:41:41.420+03	-7.00674	39.1873	54	2.1	Annual Crops	Less than 10%	2	1.5	Crops or Residues	cashew cassava coconut mango	No evidence of charcoal making	No evidence of charcoal making	No evidence of grazing	No evidence of grazing	No	Village Land	Communal	unknown	unknown																				Settlements and east part of plot there is swarmp area
42	18	2018-09-10T11:04:52.903+03	2018-09-10T11:19:48.892+03	-5.90978	38.3015	336	1	Young Forest	Between 10% and 40%	9.6	4	No evidence of farming		Charcoal Kiln or Scar	Charcoal Bags	Livestock dung	Livestock dung	No	Village Land	Communal	2010	to make charcoal	Yes	Yes	harvesting wood products other than charcoal grazing	sesame	cash	cooking wood timber building poles	Yes	8												Young forest. Near the plot there is a river.
43	36	2018-09-11T11:49:37.380+03	2018-09-11T12:03:23.521+03	-5.33448	37.4911	1091.7	1.8	Grassland	Less than 10%	4	4	No evidence of farming		No evidence of charcoal making	No evidence of charcoal making	Livestock dung	Livestock seen within the vicinity of the plot Livestock dung	Yes	Village Land	Communal	2012	to create a farm	Yes	Yes	grazing	maize	food cash		No		No	male female	32	40	Yes	No	No	0	No		Better farming land	Area is planned for grazing but encroached for agriculture ten years ago.
44	89	2018-09-11T13:56:03.550+03	2018-09-11T14:06:05.287+03	-5.43917	37.5865	893.6	1.8	Annual Crops	Less than 10%	12	10.3	Crops or Residues	cowpeas maize	No evidence of charcoal making	No evidence of charcoal making	Livestock dung	Livestock dung	Yes	Village Land	Communal	2006	to create a farm	Unknown	Yes	grazing road, dam, rail, or powerlines	maize	food cash		No													Area is a typical farm. The border of the plot is a path. Only one tree.
45	19	2018-09-11T15:04:40.315+03	2018-09-11T15:14:59.062+03	-5.46629	37.6558	834.7	2.4	Bushland	Less than 10%	11.7	3	No evidence of farming		No evidence of charcoal making	No evidence of charcoal making	Livestock dung	Livestock seen within the vicinity of the plot Livestock dung Grazed grass or foliage in the plot	Yes	Village Land	Communal	2015	to create a farm	Unknown	Yes	grazing	maize	food cash		No													Area used for grazing but not planned for grazing. The village consider the area to be farm land.
46	117	2018-09-11T15:52:23.615+03	2018-09-11T16:01:42.110+03	-5.5365	37.6947	807.1	1.5	Young Forest	Between 10% and 40%	8.5	5	No evidence of farming		No evidence of charcoal making	No evidence of charcoal making	Livestock dung Grazed grass or foliage in the plot	Livestock dung Grazed grass or foliage in the plot	Yes	Village Land	Communal	2014	to create a farm	Unknown	Yes	grazing	No crops planted	unknown		No													Area left for future farming
47	11	2018-09-13T12:47:58.627+03	2018-09-13T13:03:24.603+03	-5.54292	36.6394	1305.2	2	Annual Crops	Less than 10%	8	3	Crops or Residues	maize sesame	No evidence of charcoal making	No evidence of charcoal making	Livestock dung	Livestock seen within the vicinity of the plot Livestock dung	No	Village Land	Communal	2012	to create a farm	No	Yes	grazing	maize	food cash		No		Yes	male female	14	60	Unknown	Yes	No	30	No		Economic Opportunity	Typical farm.
49	109	2018-09-14T11:54:06.906+03	2018-09-14T11:58:51.460+03	-5.55117	36.8493	1299.7	1.5	Annual Crops	Less than 10%	0	0	Crops or Residues	cowpeas maize	No evidence of charcoal making	No evidence of charcoal making	Livestock dung	Livestock dung	No	Village Land	Communal	2012	to create a farm	Unknown	Yes	grazing	maize	cash		No													Typical farm.
50	28	2018-09-14T16:25:18.656+03	2018-09-14T16:35:49.247+03	-5.51294	37.0209	1358	1.5	Grassland	Less than 10%	0	0	Crops or Residues	None	No evidence of charcoal making	No evidence of charcoal making	Livestock dung	Livestock dung	Yes	Village Land	Communal	2016	to create a farm	No	Yes	grazing	cowpeas maize	food cash		Yes	1	Yes	male female	45	25	Yes	Yes	Yes					Plot sorrounded by bushland on the southern part.
51	58	2018-09-15T14:22:43.929+03	2018-09-15T14:28:18.522+03	-6.08383	36.3589	1023.1	1.8	Bushland	Less than 10%	5	4.2	No evidence of farming		Charcoal Kiln or Scar	No evidence of charcoal making	Livestock dung Grazed grass or foliage in the plot	Livestock dung Grazed grass or foliage in the plot	No	General Land	Leased	2010	to create a farm	Yes	Yes	grazing	maize	food cash		No													Area belongs to ranch. It was encroached in early 2010.
52	13	2018-09-17T11:00:53.195+03	2018-09-17T20:18:46.100+03	-6.75138	36.2882	1786.8	1.8	Grassland	Less than 10%	0	0	Crops or Residues	maize	No evidence of charcoal making	No evidence of charcoal making	Livestock dung	Livestock dung	Yes	Village Land	Communal	2015	to harvest wood products other than charcoal	No	Yes	grazing	beans maize	food cash	cooking wood	No		Yes	male	30	50	No	Yes	Yes					There are tree stumps and crop residues in the plot.
53	84	2018-09-17T16:41:55.005+03	2018-09-17T16:49:54.063+03	-6.54474	36.0142	1024	1.75	Grassland	Less than 10%	0	0	No evidence of farming		No evidence of charcoal making	No evidence of charcoal making	Livestock dung Grazed grass or foliage in the plot	Livestock dung Grazed grass or foliage in the plot	Yes	Village Land	Communal	2010	to create a farm	No	Yes	harvesting wood products other than charcoal grazing	other	food cash	cooking wood building poles	Yes	4												Fallow land. A few tree stumps are regenerating but most of the plot is bare land.
54	119	2018-09-19T12:10:23.646+03	2018-09-19T12:18:11.170+03	-6.58717	35.778	937.7	1.8	Grassland	Less than 10%	0	0	Crops or Residues	Millet	No evidence of charcoal making	No evidence of charcoal making	Livestock dung Grazed grass or foliage in the plot	Livestock dung Grazed grass or foliage in the plot	Yes	Village Land	Communal	2014	to create a farm	Yes	Yes	harvesting wood products other than charcoal grazing	maize other	food cash	cooking wood building poles	Yes	1												Fallow land for one year. The area is used for livestock grazing for business.
55	41	2018-09-20T11:31:18.845+03	2018-09-20T11:45:32.230+03	-6.39448	35.3669	882.3	2.4	Annual Crops	Less than 10%	0	0	Crops or Residues	Millet sunflower	No evidence of charcoal making	No evidence of charcoal making	Livestock dung	Livestock dung	Yes	Village Land	Communal	2014	to create a farm	No	Yes	harvesting wood products other than charcoal grazing road, dam, rail, or powerlines	other	food	cooking wood building poles	Yes	0												Currently used as farm. There is a road across the plot
56	74	2018-09-21T11:27:35.909+03	2018-09-21T11:37:15.454+03	-5.12005	35.7316	1171.7	1.5	Annual Crops	Less than 10%	0	0	Crops or Residues	maize millet sunflower	No evidence of charcoal making	No evidence of charcoal making	Livestock dung	Livestock dung	No	Village Land	Communal	2013	to create a farm	Yes	Yes	harvesting wood products other than charcoal grazing	maize	food	cooking wood building poles	No		Yes	male	42	42	Yes	Yes	Yes					This is a farm.
57	47B	2018-09-22T11:05:41.680+03	2018-09-22T11:22:59.606+03	-5.15495	35.3103	1277	2.4	Annual Crops	Less than 10%	8	8	Crops or Residues	sunflower	No evidence of charcoal making	No evidence of charcoal making	Livestock dung	Livestock dung	Yes	Village Land	Communal																						Farm surrounded by bush. Dikdik dung seen in the plot
58	101	2018-09-22T14:24:49.629+03	2018-09-22T14:38:35.966+03	-5.05784	35.4662	1217.7	1.8	Annual Crops	Less than 10%	11.3	11.3	Crops or Residues	maize	No evidence of charcoal making	No evidence of charcoal making	Livestock dung	Livestock seen within the vicinity of the plot Livestock dung	Yes	Village Land	Communal	2014	to create a farm	No	Yes	harvesting wood products other than charcoal grazing	sesame	cash	cooking wood building poles	No		Yes	male female	19	30	No	Yes	No	4	Yes	Singida Rural	Economic Opportunity Better farming land	Farm which has only one tree
59	34	2018-09-23T11:10:40.067+03	2018-09-23T11:16:28.370+03	-5.28141	35.8309	1155.9	1.8	Annual Crops	Less than 10%	4	4	Crops or Residues	maize	No evidence of charcoal making	No evidence of charcoal making	Livestock dung	Livestock dung	Yes	Village Land	Communal	2010	to create a farm	No	Yes	grazing	other	food cash		No													Still a farm with scattered trees
60	15B	2018-09-24T09:35:53.301+03	2018-09-24T09:45:35.339+03	-4.49273	35.624	1609.4	1.25	Other that really really can't fit in one of these categories	Less than 10%	21	3	Crops or Residues	cowpeas	Charcoal Kiln or Scar	Charcoal Kiln or Scar	Livestock dung	Livestock dung	Yes	Village Land	Communal	2016	to create a farm	Yes	Yes	harvesting wood products other than charcoal grazing	cowpeas maize sunflower	food cash	cooking wood building poles	No													Part of plot is covered by crops, road and partly forest.
61	54	2018-09-25T11:15:21.636+03	2018-09-25T11:54:49.159+03	-4.97337	34.4176	1204.5	1.5	Annual Crops	Less than 10%	12	11	Crops or Residues	maize	No evidence of charcoal making	No evidence of charcoal making	Livestock dung	Livestock seen within the vicinity of the plot Livestock dung Grazed grass or foliage in the plot	Yes	Village Land	Communal	2017	to create a farm	Yes	Yes	harvesting wood products other than charcoal grazing	maize	food	cooking wood timber	No													Farm with some standing trees and stumps.
62	20b	2018-09-25T16:23:04.190+03	2018-09-25T16:37:58.298+03	-5.06429	34.9887	1417.8	2.1	Annual Crops	Less than 10%	18	15	tillage Crops or Residues	Millet	No evidence of charcoal making	Charcoal Kiln or Scar	Livestock dung Grazed grass or foliage in the plot	Livestock seen within the vicinity of the plot Livestock dung Grazed grass or foliage in the plot	Yes	Village Land	Village Land Forest Reserve	2015	to create a farm	Yes	Yes	harvesting wood products other than charcoal grazing	other	food cash	cooking wood	No		No	male female	22	62	Yes	Yes	No	20	No		Better farming land	Farm within the village forest reserve
63	118	2018-09-26T12:01:57.944+03	2018-09-26T12:12:15.036+03	-5.6243	34.8929	1327.7	1.8	Annual Crops	Less than 10%	0	0	Crops or Residues	sunflower	Charcoal Bags	Charcoal Kiln or Scar	Livestock dung	Livestock dung	No	Village Land	Communal	2015	to create a farm	Yes	Yes	harvesting wood products other than charcoal grazing	sunflower	cash	cooking wood	No		Yes	male	18	58	Unknown	Yes	No	18	No		Better farming land	Near the plot there is a football ground. A road passes through the centre of the plot.
64	59	2018-09-26T13:29:12.741+03	2018-09-26T13:35:47.199+03	-5.72429	34.8231	1261.8	1.5	Bare Land	Less than 10%	3	3	Stumps and house nearest the plot		No evidence of charcoal making	No evidence of charcoal making	Livestock dung Grazed grass or foliage in the plot	Livestock dung Grazed grass or foliage in the plot	Yes	General Land	Local authority Reserve	2015	to create a farm	Unknown	Yes	harvesting wood products other than charcoal grazing	maize other	food cash	cooking wood	Yes	3												The plot is surrounded by bush land.
65	93	2018-09-27T09:33:07.225+03	2018-09-27T09:58:59.593+03	-6.38936	34.8407	1149.3	1.8	Grassland	Less than 10%	0	0	tillage vegetation clearing		No evidence of charcoal making	No evidence of charcoal making	Livestock dung	Livestock dung Grazed grass or foliage in the plot	Yes	Village Land	Village Land Forest Reserve	2013	to create a farm	No	Yes	harvesting wood products other than charcoal grazing other	maize	food cash	cooking wood	Yes	5	No	male female	45	40	No	Yes	No	5	No		Better farming land	Area is the buffer zone between Muhesi Game Reserve and village. We found a house and two farmers near the plot, however the house had been damaged.
66	35	2018-09-27T12:05:29.715+03	2018-09-27T12:17:07.170+03	-6.66229	35.0378	1063.5	1.5	Woody Regeneration	Less than 10%	13	10	Stumps		No evidence of charcoal making	No evidence of charcoal making	Livestock dung Grazed grass or foliage in the plot	Livestock dung Grazed grass or foliage in the plot	Yes	Village Land	Communal	2016	to create a farm	No	Yes	grazing	maize	food		Yes	3	Yes	male	50	50	No	Yes	No	44	No		other	Area located for farming. It has standing trees. On the other side of the plot there are many standing trees.
67	51b	2018-09-27T15:43:49.747+03	2018-09-27T15:50:58.770+03	-6.22029	35.0807	1218.5	1.25	Grassland	Less than 10%	0	0	Crops or Residues	maize	No evidence of charcoal making	No evidence of charcoal making	Livestock dung	Livestock seen within the vicinity of the plot Livestock dung Grazed grass or foliage in the plot	Yes	Village Land	Communal	2014	to create a farm	No	Yes	grazing	maize	food cash		No													Farm within a village forest reserve
68	31b	2018-09-28T15:19:10.066+03	2018-09-28T15:28:02.966+03	-6.69498	33.5844	1257.2	1.25	Woody Regeneration	Less than 10%	6.3	5	The area was cleared but they did not plant crops		No evidence of charcoal making	No evidence of charcoal making	Livestock dung Grazed grass or foliage in the plot	Livestock dung Grazed grass or foliage in the plot	Yes	Village Land	Communal	2012	to create a farm	No	Yes	grazing	No crops planted	unknown		No													The plot is part of Rungwa North open area which is the part of hunting block
69	114	2018-09-28T17:13:07.335+03	2018-09-28T17:23:50.860+03	-6.74827	33.5398	1300.5	1.5	Grassland	Less than 10%	0	0	Stumps		No evidence of charcoal making	No evidence of charcoal making	Livestock dung Grazed grass or foliage in the plot	Livestock dung Grazed grass or foliage in the plot	Yes	Village Land	Communal	2013	to create a farm	No	Yes	grazing	maize	food cash		No													Abandoned area where encroachers were removed by Rungwa North hunting block management. It was a collaboration between Kilombero North Hunting Safaris and the district government. Near the plot there is a Sukuma settlement from Shinyanga. Almost the whole area is occupied by people from Lake Victoria Zone.
70	110	2018-09-29T08:25:24.703+03	2018-09-29T08:45:21.243+03	-6.84917	33.5696	1251	1.5	Annual Crops	Less than 10%	19	6.1	vegetation clearing Crops or Residues	maize	No evidence of charcoal making	No evidence of charcoal making	Livestock dung Grazed grass or foliage in the plot	Livestock dung Grazed grass or foliage in the plot	Yes	Village Land	Communal	2014	to create a farm	No	Yes	harvesting wood products other than charcoal grazing	maize	food cash	cooking wood	No													Currently used as farm but there are a few remaining trees near the plot
71	115b	2018-09-29T09:14:35.476+03	2018-09-29T09:21:38.778+03	-6.83384	33.5651	1256.2	1.8	Annual Crops	Less than 10%	20	20	vegetation clearing Crops or Residues	maize	No evidence of charcoal making	No evidence of charcoal making	Livestock dung Grazed grass or foliage in the plot	Livestock seen within the vicinity of the plot Livestock dung Grazed grass or foliage in the plot	Yes	Village Land	Communal	2014	to create a farm	No	Yes	harvesting wood products other than charcoal grazing	maize	food cash	cooking wood	No													Plot has only tree
72	62	2018-09-29T14:53:28.871+03	2018-09-29T15:03:13.721+03	-6.00673	33.9144	1497.9	1.5	Annual Crops	Less than 10%	18	18	vegetation clearing Crops or Residues	maize	No evidence of charcoal making	No evidence of charcoal making	Livestock dung Grazed grass or foliage in the plot	Livestock dung Grazed grass or foliage in the plot	Yes	Village Land	Communal	2013	to create a farm	No	Yes	grazing	maize	food cash		No													Its a farm. There is only one tree in the plot
73	111	2018-09-30T09:40:42.621+03	2018-09-30T10:39:38.279+03	-6.17295	34.0336	1401.6	1.8	Annual Crops	Less than 10%	0	0	vegetation clearing Crops or Residues	maize	No evidence of charcoal making	No evidence of charcoal making	Livestock dung Grazed grass or foliage in the plot	Livestock dung Grazed grass or foliage in the plot	Yes	Village Land	Communal	2011	to create a farm	No	Yes	grazing	maize sunflower	food		No		Yes	male female	12	51	No	Yes	No	12	Yes	Nzega	Better farming land	Farm.
74	81	2018-09-30T15:11:57.663+03	2018-09-30T15:17:42.129+03	-5.65339	34.5713	1346.3	1.25	Grassland	Less than 10%	0	0	Other Evidence		No evidence of charcoal making	No evidence of charcoal making	Livestock dung	Livestock dung	Yes	Village Land	Communal	2014	to create a farm	No	Yes	grazing	other	food cash		No													Plot is within a village forest reserve. Also surrounded by thicket forest
75	45	2018-10-01T13:38:34.130+03	2018-10-01T15:08:02.846+03	-5.45432	34.0536	1200.3	0.9	Annual Crops	Less than 10%	0	0	Crops or Residues	maize sunflower	No evidence of charcoal making	No evidence of charcoal making	Livestock dung	Livestock seen within the vicinity of the plot Livestock dung	No	Village Land	Communal	2008	to create a farm	No	Yes	grazing	maize sunflower	food cash		No													Old farm
76	88	2018-10-02T12:30:37.534+03	2018-10-02T20:50:58.593+03	-4.77191	32.5366	1121.4	1.5	Annual Crops	Less than 10%	11.3	11	vegetation clearing Crops or Residues	maize	No evidence of charcoal making	No evidence of charcoal making	Livestock dung	Livestock dung	Yes	Reserved Land	Central government Forest Reserve	2016	to create a farm	Yes	Yes	grazing	maize	food cash		No		Yes	male	18	31	Yes	Yes	No	3	Yes	Shinyanga	Better farming land	Farm withinin Igombe FR. Near the plot there is a house.
77	33b	2018-10-03T11:53:25.843+03	2018-10-03T13:10:31.398+03	-4.57252	32.6029	1199.4	1.5	Annual Crops	Less than 10%	13.5	2.6	tillage Crops or Residues	sunflower	No evidence of charcoal making	No evidence of charcoal making	Livestock seen within the vicinity of the plot Livestock dung Grazed grass or foliage in the plot	Livestock seen within the vicinity of the plot Livestock dung Grazed grass or foliage in the plot	Yes	Reserved Land	Central government Forest Reserve	2015	to create a farm	Unknown	Yes	grazing	sunflower	food		No													Farm within the Igombe River Forest Reserve. Signs of pitsawing found in the plot.
78	86	2018-10-03T17:28:30.573+03	2018-10-03T17:39:49.149+03	-4.63097	32.9285	1200.7	1.8	Annual Crops	Less than 10%	0	0	Crops or Residues	maize	No evidence of charcoal making	No evidence of charcoal making	Livestock seen within the vicinity of the plot Livestock dung	Livestock seen within the vicinity of the plot Livestock dung	Yes	Reserved Land	Central government Forest Reserve	2014	to create a farm	No	Yes	harvesting wood products other than charcoal grazing	maize	food cash	cooking wood timber building poles	No													Many parts of this Reserve are currently severely deforested for farming and there were some planks in the plot. Also there is a path in the plot.
79	75	2018-10-04T13:28:24.898+03	2018-10-04T13:40:50.753+03	-4.63921	33.5436	1239.6	2	Annual Crops	Less than 10%	0	0	Crops or Residues	rice	No evidence of charcoal making	No evidence of charcoal making	Livestock dung	Livestock dung	No	Village Land	Communal	2012	to create a farm	No	Yes	Trees were burnt	rice	food cash		No													The plot is currently used for rice farms and on its eastern side there is still a forest. No stumps.
80	78	2018-10-08T12:36:55.407+03	2018-10-08T13:12:47.357+03	-5.13943	32.276	1123.7	1.8	Young Forest	Between 10% and 40%	7	6	Old stumps		No evidence of charcoal making	Charcoal Kiln or Scar	Livestock dung Grazed grass or foliage in the plot	Livestock dung Grazed grass or foliage in the plot	Yes	Village Land	Customary Right of Occupancy	2010	to create a farm	No	Yes	harvesting wood products other than charcoal, grazing, burning cut trees	rice	food	cooking wood tobacco curing wood	Yes	8												The area is under individual occupant and having growing trees. Outside the plot there are fresh stumps of Mninga and other trees.
81	67B	2018-10-09T11:34:47.311+03	2018-10-09T11:45:41.071+03	-4.56053	31.8791	1076.4	1.5	Bare Land	Less than 10%	0	0	vegetation clearing stumps		No evidence of charcoal making	No evidence of charcoal making	Livestock dung Grazed grass or foliage in the plot	Livestock dung Grazed grass or foliage in the plot	Yes	Village Land	Customary Right of Occupancy	2013	to create a farm	No	Yes	harvesting wood products other than charcoal grazing	rice	food cash	cooking wood	No													The village is within Ulyankuru forest reserve.
82	116	2018-10-09T15:48:01.294+03	2018-10-09T16:04:20.538+03	-4.54518	32.4042	1160.1	1.8	Settlement	Less than 10%	16	16	Crops or Residues	maize	No evidence of charcoal making	No evidence of charcoal making	Livestock dung	Livestock seen within the vicinity of the plot Livestock dung	Yes	Village Land	Customary Right of Occupancy	2003	to create a farm	No	Yes	harvesting wood products other than charcoal grazing	maize	food	cooking wood building poles	No		Yes	male female	33	35	No	Yes	No	15	Yes	Kwimba-Mwanza	Land Shortage Better farming land	The area is within Uliankuru forest reserve. There is forest near to the settlement.
83	39	2018-10-11T10:34:28.024+03	2018-10-11T11:25:13.923+03	-6.7525	32.2533	0	1.8	Forest	Between 10% and 40%	18	7	Crops or Residues	maize millet sesame	No evidence of charcoal making	No evidence of charcoal making	Livestock dung Grazed grass or foliage in the plot	Livestock dung Grazed grass or foliage in the plot	Yes	Reserved Land	Central government Forest Reserve	2016	to create a farm	No	Yes	harvesting wood products other than charcoal grazing	maize sesame	food cash	building poles	No													Farmers have been evicted by TFS and District staff. It was severely degraded and is half farmland.
84	72	2018-10-11T10:55:33.473+03	2018-10-11T11:25:40.593+03	-6.74761	32.2582	0	1.8	Annual Crops	Less than 10%	0	0	Crops or Residues	maize okra	No evidence of charcoal making	No evidence of charcoal making	Livestock dung Grazed grass or foliage in the plot	Livestock dung Grazed grass or foliage in the plot	Yes	Reserved Land	Central government Forest Reserve	2016	to create a farm	No	Yes	harvesting wood products other than charcoal grazing	maize okra sesame	food cash	building poles	No													Farmers has been evicted by TFS and District staff.
85	32	2018-10-12T15:45:03.126+03	2018-10-12T15:57:16.781+03	-5.84076	30.7389	1432.6	1.8	Annual Crops	Less than 10%	0	0	Crops or Residues	cassava maize	No evidence of charcoal making	No evidence of charcoal making	Livestock dung	Livestock dung	Yes	Village Land	Communal	2017	to create a farm	No	Yes	grazing	cassava maize	food cash		No													Near the plot there is a traditional livestock enclosure (boma). Farm created in the village forest
86	112	2018-10-13T12:17:02.808+03	2018-10-13T14:49:39.734+03	-6.3323	31.4276	1210.5	2.1	Annual Crops	Less than 10%	16	6	tillage Crops or Residues	maize	No evidence of charcoal making	No evidence of charcoal making	Livestock dung Grazed grass or foliage in the plot	Livestock dung Grazed grass or foliage in the plot	Yes	Reserved Land	Central government Forest Reserve	2015	to create a farm	No	Yes	grazing, burning of cut trees	maize	food		No													Farm within Ugalla Forest Reserve. Cut trees were burnt. The plot is half farm / half forest.
87	12	2018-10-15T12:26:18.756+03	2018-10-15T12:39:33.106+03	-6.58516	31.0264	984.7	1.25	Annual Crops	Less than 10%	0	0	Crops or Residues	maize groundnuts	Charcoal Kiln or Scar	Charcoal Kiln or Scar	Livestock dung Grazed grass or foliage in the plot	Livestock dung Grazed grass or foliage in the plot	Yes	Village Land	Communal	2013	to create a farm	Yes	Yes	grazing	maize ground nuts	food cash		No													The plot is outside the indicated village. It is in Tumaini village in Itenka Ward. The farmers at this village are mostly coming from Mwanza (Sukuma).
88	100	2018-10-17T11:20:18.890+03	2018-10-17T11:42:13.490+03	-7.9465	31.8671	825	1.75	Woody Regeneration	Less than 10%	4	4	No evidence of farming		No evidence of charcoal making	No evidence of charcoal making	Livestock dung Grazed grass or foliage in the plot	Livestock dung Grazed grass or foliage in the plot	Yes	Village Land	Cemetery	2015	to create a farm	No	Yes	harvesting wood products other than charcoal, grazing	finger millet	food	cooking wood building poles	Yes	3												The area is currently a cemetery.
89	26	2018-10-17T10:02:19.940+03	2018-10-17T10:22:51.897+03	-7.83805	31.7831	866	1.5	Annual Crops	Less than 10%	0	0	Crops or Residues	maize	Charcoal Kiln or Scar	Charcoal Kiln or Scar	Livestock seen within the vicinity of the plot Livestock dung	Livestock seen within the vicinity of the plot Livestock dung	Yes	Village Land	Communal	2013	to create a farm	Yes	Yes	harvesting wood products other than charcoal grazing	finger millet	food cash	cooking wood building poles	No													The plot is at the border of another village. Regeneration of Acacia. The area is currently rented to farmers.
90	50	2018-10-19T13:20:58.922+03	2018-10-19T13:33:46.187+03	-8.17968	33.1613	1321	1.8	Annual Crops	Less than 10%	18	2.5	Crops or Residues	maize	No evidence of charcoal making	No evidence of charcoal making	Livestock dung	Livestock seen within the vicinity of the plot Livestock dung	Yes	Village Land	Communal	2015	to create a farm	No	Yes	grazing	maize sweet potato	food		No		Yes	male female	18	54	No	Yes	No	18	Yes	Shinyanga Urban	Economic Opportunity Better farming land Better grazing land	Part of the plot is a farm and the other side is forest.
91	49B	2018-10-19T16:16:55.076+03	2018-10-19T16:24:39.671+03	-8.04561	33.3696	1346.5	1.5	Annual Crops	Less than 10%	0	0	Cashwenut trees		No evidence of charcoal making	No evidence of charcoal making	No evidence of grazing	No evidence of grazing	Yes	Village Land	Communal	2015	to create a farm	No	Yes	harvesting wood products other than charcoal	tobacco	cash	cooking wood tobacco curing wood building poles	No		Yes	male	20	45	Yes	No	No	3	No		Economic Opportunity Better farming land	New farm for cashewnuts
92	97	2018-10-20T10:26:36.797+03	2018-10-20T10:39:49.478+03	-7.39272	33.3276	1289.1	1.5	Annual Crops	Less than 10%	8.8	8.8	Crops or Residues	maize	No evidence of charcoal making	No evidence of charcoal making	Livestock dung	Livestock dung	Yes	Village Land	Communal	2016	to create a farm	No	Yes	harvesting wood products other than charcoal grazing	maize sorghum	food	cooking wood tobacco curing wood building poles	No		Yes	male female	12	37	No	Yes	No	3	Yes	Meatu	Land Shortage	There are some standing trees in the farm. All trees burnt during the farm preparation.
93	48	2018-10-18T11:56:19.776+03	2018-10-18T15:03:44.646+03	-8.52878	31.8826	1745.2	2.4	Forest	Between 10% and 40%	16	12.5	Crops or Residues	beans maize	No evidence of charcoal making	Charcoal Kiln or Scar	Livestock dung Grazed grass or foliage in the plot Other Evidence	Livestock dung Grazed grass or foliage in the plot Other Evidence	Yes	Village Land	Customary Right of Occupancy	2016	to create a farm	No	Yes	grazing, burning of cut trees	beans maize	food cash		No													The plot is partly severely degraded and partly having forest. The plot is on a steep slope.
94	102	2018-10-20T09:21:10.252+03	2018-10-20T09:42:04.387+03	-7.38743	33.2703	1274.1	2.1	Forest	Between 10% and 40%	14.5	3	Old stumps		No evidence of charcoal making	No evidence of charcoal making	Livestock dung Grazed grass or foliage in the plot	Livestock dung Grazed grass or foliage in the plot	Yes	Village Land	Communal	2012	to create a farm	No	Yes	harvesting wood products other than charcoal grazing	maize ground nuts	food	cooking wood building poles	Yes	2	No	male female	15	45	Unknown	No	No	5	Yes	Shinyanga	Land Shortage Better farming land	The area is half deforested and half having forest. Footpath within the plot. The area was set for grazing in 2006 but in 2016-2017 was farmed for maize.
95	105	2018-10-21T08:36:01.521+03	2018-10-21T08:42:11.881+03	-7.62873	33.2398	1473.5	1.5	Bare Land	Less than 10%	1.5	1	Old stumps		No evidence of charcoal making	No evidence of charcoal making	Livestock dung Grazed grass or foliage in the plot	Livestock seen within the vicinity of the plot Livestock dung	Yes	Reserved Land	Central government Forest Reserve	2013	to create a farm	No	Yes	grazing	beans maize ground nuts	food		Yes	3												Farm within Kipembawe forest reserve. Near the plot there is settlement and cattle shade.
96	60	2018-10-20T14:40:54.739+03	2018-10-20T15:38:12.196+03	-6.95294	33.3485	1180.9	1.8	Grassland	Less than 10%	18	1.5	vegetation clearing		No evidence of charcoal making	No evidence of charcoal making	Livestock dung	Livestock dung Grazed grass or foliage in the plot	Yes	Village Land	Communal																						Half of the plot is regenerating. The plot was at the wild animal corridor. There was a lot of fresh elephants dung and elephant tracks.
97	106	2018-10-22T12:59:05.120+03	2018-10-22T13:20:51.103+03	-8.06519	32.8747	1144.3	1.8	Grassland	Less than 10%	0	0	vegetation clearing		No evidence of charcoal making	No evidence of charcoal making	Livestock dung	Livestock seen within the vicinity of the plot Livestock dung	Yes	Village Land	Communal	2016	to create a farm	No	Yes	harvesting wood products other than charcoal grazing	No crops planted	unknown	cooking wood building poles	No		Yes	male	0	0	No	No	No	5	Yes	Mvomero	Better grazing land	In 2 years past, the area was cleared for farming but not planted. It is now prepared for farming again.
98	53	2018-10-22T15:36:30.220+03	2018-10-22T15:45:39.278+03	-8.20558	32.8251	1134.4	1.5	Annual Crops	Less than 10%	18	18	vegetation clearing		No evidence of charcoal making	No evidence of charcoal making	Livestock dung Grazed grass or foliage in the plot	Livestock dung Grazed grass or foliage in the plot	Yes	Village Land	Communal	2014	to create a farm	Yes	Yes	grazing	maize	food		No													There is only one tree in the plot.
99	56	2018-10-25T13:08:23.684+03	2018-10-25T16:33:33.267+03	-3.81693	30.3996	1132.2	1.5	Annual Crops	Less than 10%	13.5	8	Crops or Residues Old stumps	maize rice	No evidence of charcoal making	No evidence of charcoal making	No evidence of grazing	No evidence of grazing	Yes	General Land	General Land	2004	to create a farm	No	Yes	harvesting wood products other than charcoal	unknown	food cash	timber	No													There are many dead stumps and dead standing trees with some few living trees. The dead trees seems to take time in decomposing as they were left to dry since 1998. The land is planned to be invested for sugar cane plantation. Currently, villagers are allowed to plant temporary crops.
100	29	2018-10-25T16:54:52.133+03	2018-10-25T17:06:59.777+03	-4.28159	30.4493	1149.2	1.8	Annual Crops	Less than 10%	21	20	Crops or Residues	cassava cowpeas	Charcoal Kiln or Scar	Charcoal Kiln or Scar	Livestock dung	Livestock dung	Yes	Village Land	Customary Right of Occupancy	2015	to make charcoal	Yes	Yes	harvesting wood products other than charcoal grazing	cassava maize	food cash	cooking wood	No		Yes	male female	20	42	Yes	Yes	Yes					It is a farm with some standing trees. The first occupant died and the land was sold to another person. No details about the second occupant.
101	1	2018-10-29T11:57:21.079+03	2018-10-29T12:52:58.676+03	-3.84585	30.422	1127.7	1.8	Annual Crops	Less than 10%	8	6	tillage Crops or Residues	cassava	Charcoal Kiln or Scar	No evidence of charcoal making	No evidence of grazing	No evidence of grazing	Yes	Village Land	Communal	2006	to create a farm	Yes	Yes	none	rice	food cash		No		Yes	male female	19	23	Yes	Yes	Yes					There are some standing trees in the area with many dead old trees.
102	92	2018-10-29T14:46:57.311+03	2018-10-29T14:58:13.247+03	-3.6398	30.7768	1372.4	4.1	Annual Crops	Less than 10%	0	0			Other Evidence	Other Evidence	Other Evidence	Other Evidence	No	General Land	Communal	2015	to create a farm	Unknown	Unknown	none				No													The substitute plot was taken outside the refugee camp because we didn't have a permit from the District Commissioner to enter the camp.
103	99	2018-10-30T11:57:38.416+03	2018-10-30T12:08:36.619+03	-3.05917	31.5918	1226.9	1.8	Woody Regeneration	Less than 10%	6	2	Old terraces		Charcoal Kiln or Scar	Charcoal Kiln or Scar	Livestock dung	Livestock dung	Yes	Reserved Land	Central government Forest Reserve	2012	to make charcoal	Yes	Yes	harvesting wood products other than charcoal grazing	maize	food	cooking wood timber building poles	Yes	2												It is a Forest Reserve area that is planned for conversion to forest plantation.
104	7	2018-10-31T11:40:02.097+03	2018-10-31T11:52:28.850+03	-3.21739	32.0293	1179.7	1.5	Annual Crops	Less than 10%	6.8	2.5	Crops or Residues Terraces	cassava maize	Charcoal Kiln or Scar	Charcoal Kiln or Scar	Livestock dung Other Evidence	Livestock dung Other Evidence	No	Village Land	Customary Right of Occupancy	2014	to create a farm	No	Yes	grazing	maize	food		No		Yes	male female	0	0	No	Yes	No	0	Yes	He doesn't know	Better farming land	The area is dominated by Lantana camara shrubs (an invasive species). There is settlement nearby.
105	107	2018-11-01T10:59:08.728+03	2018-11-01T11:12:21.488+03	-2.94627	32.0231	1220.2	2.1	Woody Regeneration	Less than 10%	2.5	2.5	Terraces		Charcoal Kiln or Scar	Charcoal Kiln or Scar	Livestock seen within the vicinity of the plot Livestock dung Grazed grass or foliage in the plot Other Evidence	Livestock seen within the vicinity of the plot Livestock dung Grazed grass or foliage in the plot Other Evidence	Yes	Reserved Land	Central government Forest Reserve	2008	to make charcoal	Yes	Yes	harvesting wood products other than charcoal grazing	maize rice	food	cooking wood building poles	No													Many shrubs and grasses inside the plot with a few regenerating trees around.
106	98	2018-11-01T11:46:17.602+03	2018-11-01T11:53:20.892+03	-2.8712	32.0747	1228.9	1.8	Woody Regeneration	Less than 10%	3	2.5	No evidence of farming		Charcoal Kiln or Scar	Charcoal Kiln or Scar	Livestock dung	Livestock dung	Yes	Reserved Land	Central government Forest Reserve	2013	to make charcoal	Yes	No	harvesting wood products other than charcoal grazing			cooking wood building poles	No													There is a village with a reserve and mining activity is taking place in nearby mountains surrounding this area.
107	6	2018-11-01T14:52:30.840+03	2018-11-01T15:00:45.274+03	-2.69032	32.0851	1265.6	1.8	Woody Regeneration	Less than 10%	2	2	No evidence of farming		Wood cut for charcoal making	Wood cut for charcoal making	Livestock dung	Livestock dung	Yes	Reserved Land	Local Authority Forest Reserve	2013	to make charcoal	Yes	No	harvesting wood products other than charcoal grazing			cooking wood building poles	No													Plot dominated by large stones / boulders and a long steep slope. The plot is on the edge of a forest. It is being cleared for a farm.
108	57	2018-11-02T11:48:23.477+03	2018-11-02T12:13:30.231+03	-2.33476	32.2953	1169.8	0.9	Woody Regeneration	Less than 10%	4	3	Crops or Residues	beans	No evidence of charcoal making	No evidence of charcoal making	No evidence of grazing	No evidence of grazing	No	Reserved Land	Central government Forest Reserve	2013	to make charcoal	Yes	Yes	grazing	beans maize	food		No													Point located within plantation. But villagers allowed to plant crops up to certain stage of trees. Details taken about 300m. There was a heavy rain and the farm was not easy to pass.
109	8	2018-11-05T11:39:10.589+03	2018-11-05T11:47:36.138+03	-1.54496	33.9373	1157.5	2.4	Annual Crops	Less than 10%	0	0	Crops or Residues	maize	No evidence of charcoal making	No evidence of charcoal making	Livestock seen within the vicinity of the plot Livestock dung	Livestock seen within the vicinity of the plot Livestock dung	Yes	Village Land	Customary Right of Occupancy	2010	to make charcoal	Yes	Yes	grazing	maize	food		No													It is a farm with Lantana camara shrubs nearby.
110	43	2018-11-06T09:12:43.981+03	2018-11-06T09:31:34.365+03	-3.16961	33.6136	1287.3	1.5	Annual Crops	Less than 10%	0	0	Crops or Residues Terraces	Cotton	Charcoal Kiln or Scar	No evidence of charcoal making	Livestock dung	Livestock dung	Yes	Village Land	Customary Right of Occupancy	2017	to create a farm	Yes	Yes	harvesting wood products other than charcoal grazing	cotton	cash	cooking wood	No													Most parts of this area are cleared for farming (cotton crop).
111	73b	2018-11-08T11:45:57.076+03	2018-11-08T12:07:45.375+03	-2.96452	37.1045	2015.1	1.5	Young Forest	Between 10% and 40%	17	17	TFS allows farmers to plant crops up to a certain age of pine trees.		No evidence of charcoal making	No evidence of charcoal making	No evidence of grazing	No evidence of grazing	No	Reserved Land	Central government Forest Reserve	2012	for timber	No	Yes																		Pine plantation under West Kilimanjaro FR.
112	83	2018-06-30T09:00:34.655+03	2018-06-30T09:33:21.619+03	-6.56384	38.038	373	2.1	Forest	Between 10% and 40%	20	5	No evidence of farming		Wood cut for charcoal making	Charcoal Kiln or Scar	Livestock dung Other Evidence	Livestock dung Other Evidence	No	Village Land	Communal	2014	to make charcoal	Yes	No	grazing				No		No	male	18	70	No	Yes	No	1	Yes	Mbozi	Economic Opportunity	Area is typically used for charcoal making. It is very close to the Wami Mbiki Wildlife Management Area.
113	108	2018-06-27T11:29:18.460+01	2018-06-27T12:10:54.685+01	-6.33412	38.8055	20	1.25	Woody Regeneration	Less than 10%	5	2	No evidence of farming		Charcoal Kiln or Scar Wood cut for charcoal making	Charcoal Kiln or Scar Wood cut for charcoal making	Livestock dung	Livestock dung	Yes	General Land	General Land	2011	to make charcoal	Yes	No	grazing				No		Yes	male	18	65	No	No	No	7	Yes	Many district	Economic Opportunity	Incomplete restoration. People use fire to simply clear the trees. For temporary cooking and light.
114	64	2018-06-27T14:51:09.737+01	2018-06-27T15:29:35.735+01	-6.49917	38.6882	70.2	2.9	Grassland	Less than 10%	0	0	Crops or Residues Tillage	other	No evidence of charcoal making	No evidence of charcoal making	Livestock seen within the vicinity of the plot Livestock dung Grazed grass or foliage in the plot	Livestock seen within the vicinity of the plot Livestock dung Grazed grass or foliage in the plot	No	General Land	General Land	2013	to create a farm	No	Yes	grazing	maize sorghum sesame other	food		Yes	1	No	male female	17	30	Yes	Yes	No	8	Yes	Morogoro	Better farming land other	Mixed farming, Watatogwa tribe from Katesh
115	69	2018-06-28T14:15:31.453+03	2018-06-28T14:57:10.744+03	-6.0705	38.1418	414.6	1.8	Young Forest	Between 10% and 40%	20	3	No evidence of farming		No evidence of charcoal making	No evidence of charcoal making	Livestock dung Grazed grass or foliage in the plot Other Evidence	Livestock dung Grazed grass or foliage in the plot Other Evidence	Yes	Village Land	Communal	2010	grazing	No	No	grazing natural or accidental fire				No													Regenerating forest. Unclear when the forest cleared.
116	22	2018-06-28T17:42:43.129+03	2018-06-28T18:10:32.508+03	-5.97982	37.9403	446.2	1.8	Annual Crops	Less than 10%	17	15	tillage Crops or Residues	maize pumpkin	No evidence of charcoal making	Charcoal Kiln or Scar	No evidence of grazing	No evidence of grazing	Yes	Village Land	Customary Right of Occupancy	2012	to create a farm	Yes	Yes	natural or accidental fire	maize pumpkin	food		No													Large part is annual crop while other side of the plot is woodland.
117	27	2018-06-28T08:14:48.792+01	2018-06-28T08:53:43.084+01	-6.30607	38.4965	131.6	2.1	Grassland	Less than 10%	9	9	No evidence of farming		No evidence of charcoal making	No evidence of charcoal making	Grazed grass or foliage in the plot Other Evidence	Grazed grass or foliage in the plot Other Evidence	Yes	Village Land	Customary Right of Occupancy	2014	to create a farm	Yes	Yes	harvesting wood products other than charcoal grazing natural or accidental fire	maize cowpeas other	food cash	building poles	Yes	1	Yes	male	35	35	No	Yes	Yes					The farm is left fallow for one year because the owner passed away.
118	61	2018-06-29T16:02:45.095+03	2018-06-29T16:14:27.499+03	-6.85558	37.6573	573	2.4	Settlement	Less than 10%	0	0	tillage Crops or Residues	banana	No evidence of charcoal making	No evidence of charcoal making	No evidence of grazing	No evidence of grazing	No	General Land	Leased	unknown	unknown																				Sokoine University of Agriculture staff quarters. It is a settlement.
119	55	2018-06-29T10:30:57.157+03	2018-06-29T10:50:46.223+03	-6.01248	37.8227	406.6	2.1	Annual Crops	Less than 10%	3	3	tillage Crops or Residues	maize pigeon peas	No evidence of charcoal making	No evidence of charcoal making	No evidence of grazing	No evidence of grazing	No	Village Land	Customary Right of Occupancy	unknown	unknown																				The land was used for farming since 1952. Before he owned this land 2002, the area was planted with sugarcane.
120	104	2018-06-30T14:37:18.105+03	2018-06-30T14:55:37.515+03	-6.1085	38.5518	312.1	1.5	Woody Regeneration	Less than 10%	5	5	tillage Crops or Residues fallow land	maize	No evidence of charcoal making	No evidence of charcoal making	No evidence of grazing	No evidence of grazing	Yes	Village Land	Customary Right of Occupancy	2012	to create a farm	No	Yes	grazing natural or accidental fire	maize sesame	food cash		Yes	1	Yes	male female	25	50	Yes	Yes	Yes					Fallow land

## Sheet: Supp Table 2 Crops
Supplementary Table 2. Crops present per plot based on observations and informant interviews (2 = recorded through both observations and informant interviews; 1 = recorded through either observations or informant interviews)
Plot	Avocado	Banana	Beans	Cashew	Cassava	Coconut	Coffee	Cowpeas	Maize	Oil palm	Orchard	Rice	Sesame	Sorghum	Sunflower	Tea	Tobacco	Unknown	millet	Okra	Sweet potato	Mango	Pigeon peas	Groundnut	Cotton	Pumpkin	Number of crops present
120	0	0	0	0	0	0	0	0	2	0	0	0	1	0	0	0	0	0	0	0	0	0	0	0	0	0	2
114	0	0	0	0	2	0	0	0	1	0	0	0	1	1	0	0	0	0	0	0	0	0	0	0	0	0	4
113	0	0	0	0	0	0	0	0	0	0	0	0	0	0	0	0	0	0	0	0	0	0	0	0	0	0	0
116	0	0	0	0	0	0	0	0	2	0	0	0	0	0	0	0	0	0	0	0	0	0	0	0	0	2	2
8	0	0	0	0	0	0	0	2	0	0	0	0	0	2	0	0	0	0	0	0	0	0	0	0	0	0	2
117	0	0	0	0	0	0	0	1	1	0	0	0	0	0	0	0	0	0	0	0	0	0	0	0	0	0	2
28	0	1	1	0	0	0	0	0	2	0	0	0	0	0	0	0	0	0	0	0	0	0	0	0	0	0	3
51	0	0	0	0	0	0	0	0	1	0	0	0	0	0	0	0	0	0	0	0	0	0	0	0	0	0	1
85	0	0	0	0	2	0	0	0	2	0	0	0	0	0	0	0	0	0	0	0	0	0	0	0	0	0	2
98	0	0	0	0	0	0	0	0	1	0	0	0	0	0	0	0	0	0	0	0	0	0	0	0	0	0	1
1	0	0	0	0	0	0	0	0	0	0	0	0	0	2	0	0	0	0	0	0	0	0	0	0	0	0	1
2	0	0	0	0	0	0	0	0	0	0	0	0	1	0	0	0	0	0	0	0	0	0	0	0	0	0	1
11	0	0	0	2	2	0	0	0	0	0	0	0	0	0	0	0	0	0	0	0	0	0	0	0	0	0	2
14	0	0	0	0	0	0	0	2	2	0	0	0	0	2	0	0	0	0	0	0	0	0	0	0	0	0	3
16	0	0	0	0	0	0	0	1	1	0	0	0	1	2	0	0	0	0	0	0	0	0	0	0	0	0	4
19	0	0	0	1	0	0	0	2	2	0	0	0	0	0	0	0	0	0	0	0	0	0	0	0	0	0	3
21	0	0	0	0	0	0	0	0	0	0	0	0	1	0	0	0	0	0	0	0	0	0	0	0	0	0	1
13	0	0	0	0	0	0	0	2	1	0	0	0	0	2	0	0	0	0	0	0	0	0	0	0	0	0	3
23	0	0	0	0	0	0	0	0	0	0	0	0	0	0	0	0	0	0	0	0	0	2	0	0	0	0	1
26	0	0	0	0	0	0	0	0	2	0	0	0	0	0	0	0	0	0	1	0	0	0	0	0	0	0	2
50	0	0	0	0	0	0	0	1	1	0	0	0	0	0	0	0	0	0	0	0	0	0	0	0	0	0	2
18	0	0	0	0	0	0	0	2	1	0	0	0	1	0	0	0	0	0	0	0	0	0	0	0	0	0	3
58	0	0	0	0	0	0	0	0	1	0	0	0	1	0	0	0	0	0	0	0	0	0	0	0	0	0	2
62	0	0	0	0	0	0	0	0	0	0	0	0	1	0	0	0	0	0	0	0	0	0	0	0	0	0	1
22	0	0	0	0	0	0	0	2	2	0	0	0	0	0	0	0	0	0	0	0	0	0	0	0	0	0	2
65	0	0	0	0	0	0	0	0	1	0	0	0	0	0	0	0	0	0	0	0	0	0	0	0	0	0	1
39	0	0	0	0	0	0	0	0	0	0	0	0	0	0	0	0	0	0	0	0	0	0	0	0	0	0	0
40	0	0	0	0	0	0	0	2	2	0	0	2	2	0	0	0	0	0	0	0	0	0	0	0	0	0	4
24	0	0	2	0	0	0	0	0	0	0	0	0	0	0	0	0	0	0	0	0	0	0	0	0	0	0	1
25	0	0	0	0	0	0	0	2	2	0	0	0	0	2	0	0	0	0	0	0	0	0	0	0	0	0	3
27	0	0	1	0	0	0	0	0	2	0	0	0	0	0	0	0	0	0	1	0	0	0	0	0	0	0	3
9	0	0	0	2	2	0	0	1	0	0	0	0	0	0	0	0	0	0	0	0	0	0	0	0	0	0	3
104	0	0	0	0	1	0	0	0	2	0	0	0	0	0	0	0	0	0	0	0	0	0	0	0	0	0	2
3	0	0	0	0	0	0	0	0	0	0	1	0	0	2	0	0	0	0	0	0	0	0	0	0	0	0	2
31	0	0	0	0	0	0	0	0	1	0	0	0	0	0	0	0	0	0	0	0	0	0	0	2	0	0	2
32	0	0	0	0	0	0	0	0	0	0	0	2	0	0	0	0	0	0	0	0	0	0	0	0	0	0	1
4	0	0	0	0	2	0	0	0	0	0	0	0	1	0	0	0	0	1	0	0	0	0	0	0	0	0	3
15	0	0	0	2	0	0	0	0	2	0	0	0	0	1	0	0	0	0	0	0	0	0	0	0	0	0	3
35	0	0	0	0	0	0	0	0	0	0	0	0	0	0	0	0	0	0	0	0	0	0	0	0	0	0	0
37	0	0	0	0	0	0	0	0	0	0	0	1	0	0	0	0	0	0	0	0	0	0	0	0	0	0	1
44	0	0	0	0	0	0	0	1	2	0	0	0	0	0	0	0	0	0	0	0	0	0	0	0	0	0	2
47	0	0	0	0	0	0	0	0	2	0	0	0	1	0	0	0	0	0	0	0	0	0	0	0	0	0	2
49	0	0	0	0	0	0	0	1	2	0	0	0	0	0	0	0	0	0	0	0	0	0	0	0	0	0	2
29	0	0	0	0	0	0	0	0	2	0	0	0	0	0	0	0	0	0	0	0	1	0	2	0	0	0	3
52	0	0	1	0	0	0	0	0	2	0	0	0	0	0	0	0	0	0	0	0	0	0	0	0	0	0	2
53	0	0	0	0	0	0	0	0	0	0	0	0	1	0	0	0	0	0	0	0	0	0	0	0	0	0	1
54	0	0	0	0	0	0	0	0	1	0	0	0	1	0	0	0	0	0	0	0	0	0	0	0	0	0	2
55	0	0	0	0	0	0	0	0	0	0	0	0	1	0	1	0	0	0	0	0	0	0	0	0	0	0	2
56	0	0	0	0	0	0	0	0	2	0	0	0	0	0	1	0	0	0	0	0	0	0	0	0	0	0	2
63	0	0	0	0	0	0	0	0	0	0	0	0	0	0	2	0	0	0	0	0	0	0	0	0	0	0	1
59	0	0	0	0	0	0	0	0	1	0	0	0	1	0	0	0	0	0	0	0	0	0	0	0	0	0	2
60	0	0	0	0	0	0	0	2	1	0	0	0	0	0	1	0	0	0	0	0	0	0	0	0	0	0	3
61	0	0	0	0	0	0	0	0	2	0	0	0	0	0	0	0	0	0	0	0	0	0	0	0	0	0	1
73	0	0	0	0	0	0	0	0	2	0	0	0	0	0	1	0	0	0	0	0	0	0	0	0	0	0	2
64	0	0	0	0	0	0	0	0	1	0	0	0	1	0	0	0	0	0	0	0	0	0	0	0	0	0	2
82	0	0	0	0	0	0	0	0	2	0	0	0	0	0	0	0	0	0	0	0	0	0	0	0	0	0	1
90	0	0	0	0	0	0	0	0	2	0	0	0	0	0	0	0	0	0	0	0	1	0	0	0	0	0	2
67	0	0	0	0	0	0	0	0	2	0	0	0	0	0	0	0	0	0	0	0	0	0	0	0	0	0	1
69	0	0	0	0	0	0	0	0	1	0	0	0	0	0	0	0	0	0	0	0	0	0	0	0	0	0	1
70	0	0	0	0	0	0	0	0	2	0	0	0	0	0	0	0	0	0	0	0	0	0	0	0	0	0	1
71	0	0	0	0	0	0	0	0	2	0	0	0	0	0	0	0	0	0	0	0	0	0	0	0	0	0	1
72	0	0	0	0	0	0	0	0	2	0	0	0	0	0	0	0	0	0	0	0	0	0	0	0	0	0	1
91	0	0	0	0	0	0	0	0	0	0	0	0	0	0	0	0	1	0	0	0	0	0	0	0	0	0	1
74	0	0	0	0	0	0	0	0	0	0	0	0	0	1	0	0	0	0	0	0	0	0	0	0	0	0	1
75	0	0	0	0	0	0	0	0	2	0	0	0	0	0	2	0	0	0	0	0	0	0	0	0	0	0	2
92	0	0	0	0	0	0	0	0	2	0	0	0	0	1	0	0	0	0	0	0	0	0	0	0	0	0	2
77	0	0	0	0	0	0	0	0	0	0	0	0	0	0	2	0	0	0	0	0	0	0	0	0	0	0	1
78	0	0	0	0	0	0	0	0	2	0	0	0	0	0	0	0	0	0	0	0	0	0	0	0	0	0	1
79	0	0	0	0	0	0	0	0	0	0	0	2	0	0	0	0	0	0	0	0	0	0	0	0	0	0	1
81	0	0	0	0	0	0	0	0	0	0	0	1	0	0	0	0	0	0	0	0	0	0	0	0	0	0	1
97	0	0	0	0	0	0	0	0	0	0	0	0	0	0	0	0	0	0	0	0	0	0	0	0	0	0	0
84	0	0	0	0	0	0	0	0	2	0	0	0	1	0	0	0	0	0	0	2	0	0	0	0	0	0	3
87	0	0	0	0	0	0	0	0	2	0	0	0	0	0	0	0	0	0	0	0	0	0	0	2	0	0	2
89	0	0	0	0	0	0	0	0	1	0	0	0	0	0	0	0	0	0	1	0	0	0	0	0	0	0	2
101	0	0	0	0	1	0	0	0	0	0	0	1	0	0	0	0	0	0	0	0	0	0	0	0	0	0	2
10	0	0	0	0	0	0	0	0	0	0	0	0	2	0	0	0	0	0	0	0	0	0	0	0	0	0	1
94	0	0	0	0	0	0	0	0	1	0	0	0	0	0	0	0	0	0	0	0	0	0	0	1	0	0	2
95	0	0	1	0	0	0	0	0	1	0	0	0	0	0	0	0	0	0	0	0	0	0	0	1	0	0	3
30	0	0	0	0	0	0	0	0	0	0	0	0	0	2	0	0	0	0	0	0	0	0	0	0	0	0	1
99	0	0	0	0	0	0	0	0	1	0	0	1	0	0	0	0	0	1	0	0	0	0	0	0	0	0	3
100	0	0	0	0	2	0	0	1	1	0	0	0	0	0	0	0	0	0	0	0	0	0	0	0	0	0	3
76	0	0	0	0	0	0	0	0	2	0	0	0	0	0	0	0	0	0	0	0	0	0	0	0	0	0	1
102	0	0	0	0	0	0	0	0	0	0	0	0	0	0	0	0	0	0	0	0	0	0	0	0	0	0	0
103	0	0	0	0	0	0	0	0	1	0	0	0	0	0	0	0	0	0	0	0	0	0	0	0	0	0	1
105	0	0	0	0	0	0	0	0	1	0	0	1	0	0	0	0	0	0	0	0	0	0	0	0	0	0	2
106	0	0	0	0	0	0	0	0	0	0	0	0	0	0	0	0	0	0	0	0	0	0	0	0	0	0	0
107	0	0	0	0	0	0	0	0	0	0	0	0	0	0	0	0	0	0	0	0	0	0	0	0	0	0	0
108	0	0	2	0	0	0	0	0	1	0	0	0	0	0	0	0	0	0	0	0	0	0	0	0	0	0	2
109	0	0	0	0	0	0	0	0	2	0	0	0	0	0	0	0	0	0	0	0	0	0	0	0	0	0	1
110	0	0	0	0	0	0	0	0	0	0	0	0	0	0	0	0	0	0	0	0	0	0	0	0	2	0	1
33	0	0	0	0	0	0	0	0	1	0	0	2	0	0	0	0	0	0	0	0	0	0	0	0	0	0	2
34	0	0	0	0	0	0	0	2	2	0	0	0	2	0	0	0	0	0	0	0	0	0	0	0	0	0	3
43	0	0	0	0	0	0	0	0	1	0	0	0	0	0	0	0	0	0	0	0	0	0	0	0	0	0	1
119	0	0	0	0	0	0	0	0	1	0	0	0	0	0	0	0	0	0	0	0	0	0	1	0	0	0	2
112	0	0	0	0	0	0	0	0	0	0	0	0	0	0	0	0	0	0	0	0	0	0	0	0	0	0	0
115	0	0	0	0	0	0	0	0	0	0	0	0	0	0	0	0	0	0	0	0	0	0	0	0	0	0	0
20	0	0	0	0	0	0	0	0	1	0	0	0	0	0	0	0	0	0	0	0	0	0	0	0	0	0	1
45	0	0	0	0	0	0	0	0	1	0	0	0	0	0	0	0	0	0	0	0	0	0	0	0	0	0	1
48	0	0	0	0	0	0	0	0	0	0	0	0	0	0	0	0	0	0	0	0	0	0	0	0	0	0	0
66	0	0	0	0	0	0	0	0	1	0	0	0	0	0	0	0	0	0	0	0	0	0	0	0	0	0	1
83	0	0	0	0	0	0	0	0	2	0	0	0	2	0	0	0	0	0	0	0	0	0	0	0	0	0	2
86	0	0	0	0	0	0	0	0	2	0	0	0	0	0	0	0	0	0	0	0	0	0	0	0	0	0	1
93	0	0	2	0	0	0	0	0	2	0	0	0	0	0	0	0	0	0	0	0	0	0	0	0	0	0	2
5	0	0	0	0	0	0	0	0	0	0	0	0	0	0	0	0	0	0	0	0	0	0	0	0	0	0	0
6	0	0	0	0	0	0	0	0	0	0	0	1	0	0	0	0	0	0	0	0	0	0	0	0	0	0	1
7	0	0	0	0	0	0	0	0	0	0	0	0	1	0	0	0	0	0	0	0	0	0	0	0	0	0	1
12	0	0	0	0	0	0	0	0	0	0	0	0	1	0	0	0	0	0	0	0	0	0	0	0	0	0	1
17	0	0	0	0	0	0	0	0	0	0	0	0	1	0	0	0	0	0	0	0	0	0	0	0	0	0	1
36	0	0	0	0	0	0	0	0	0	0	0	0	0	0	0	0	0	0	0	0	0	0	0	0	0	0	0
38	0	0	0	0	0	0	0	0	0	0	0	0	0	0	0	0	0	0	0	0	0	0	0	0	0	0	0
42	0	0	0	0	0	0	0	0	0	0	0	0	1	0	0	0	0	0	0	0	0	0	0	0	0	0	1
46	0	0	0	0	0	0	0	0	0	0	0	0	0	0	0	0	0	0	0	0	0	0	0	0	0	0	0
68	0	0	0	0	0	0	0	0	0	0	0	0	0	0	0	0	0	0	0	0	0	0	0	0	0	0	0
80	0	0	0	0	0	0	0	0	0	0	0	1	0	0	0	0	0	0	0	0	0	0	0	0	0	0	1
88	0	0	0	0	0	0	0	0	0	0	0	0	0	0	0	0	0	0	1	0	0	0	0	0	0	0	1
111	0	0	0	0	0	0	0	0	0	0	0	0	0	0	0	0	0	0	0	0	0	0	0	0	0	0	0
41	0	0	0	1	1	1	0	0	0	0	0	0	0	0	0	0	0	0	0	0	0	1	0	0	0	0	4
118	0	1	0	0	0	0	0	0	0	0	0	0	0	0	0	0	0	0	0	0	0	0	0	0	0	0	1
96	0	0	0	0	0	0	0	0	0	0	0	0	0	0	0	0	0	0	0	0	0	0	0	0	0	0	0
57	0	0	0	0	0	0	0	0	0	0	0	0	0	0	1	0	0	0	0	0	0	0	0	0	0	0	1
	0	2	7	5	9	1	0	17	68	0	1	11	24	12	8	0	1	2	4	1	2	2	2	4	1	1	57
																											0.478992

## Sheet: Supp Table 3 Crop area
Supplementary Table: % of agricultural land used for different crops in 2016 and % of deforestation points in which crops were recorded
FAOSTAT 30-05-2019
From FAOSTAT														Calculated Value	2018 Survey results (source: 2018 Survey Results Doggart et al.)
Domain Code	Domain	Area Code	Area	Element Code	Element	Item Code	Item	Year Code	Year	Unit	Value	Flag	Flag Description	% of agricultural land	% of all deforestation points in which the crop was recorded including plots with > 1 crop	% of deforestation points where crops were present in which the crop was recorded including plots with > 1 crop	Number of plots in which the crop was recorded
															n = 119	n = 106
QC	Crops	215	United Republic of Tanzania	5312	Area harvested	56	Maize	2016	2016	ha	4057801	Im	FAO data based on imputation methodology	0.243349	0.571429	0.641509	68
QC	Crops	215	United Republic of Tanzania	5312	Area harvested	27	Rice, paddy	2016	2016	ha	1234360	Im	FAO data based on imputation methodology	0.0740252	0.092437	0.103774	11
QC	Crops	215	United Republic of Tanzania	5312	Area harvested	176	Beans, dry	2016	2016	ha	1121290	Im	FAO data based on imputation methodology	0.0672444	0.0588235	0.0660377	7
QC	Crops	215	United Republic of Tanzania	5312	Area harvested	125	Cassava	2016	2016	ha	1008706	Im	FAO data based on imputation methodology	0.0604926	0.0756303	0.0849057	9
QC	Crops	215	United Republic of Tanzania	5312	Area harvested	289	Sesame seed	2016	2016	ha	900000	*	Unofficial figure	0.0539735	0.201681	0.226415	24
QC	Crops	215	United Republic of Tanzania	5312	Area harvested	267	Sunflower seed	2016	2016	ha	860000	*	Unofficial figure	0.0515747	0.0672269	0.0754717	8
QC	Crops	215	United Republic of Tanzania	5312	Area harvested	242	Groundnuts, with shell	2016	2016	ha	780000	*	Unofficial figure	0.046777	0.0336134	0.0377358	4
QC	Crops	215	United Republic of Tanzania	5312	Area harvested	83	Sorghum	2016	2016	ha	775254	Im	FAO data based on imputation methodology	0.0464924	0.10084	0.113208	12
QC	Crops	215	United Republic of Tanzania	5312	Area harvested	122	Sweet potatoes	2016	2016	ha	761345	Im	FAO data based on imputation methodology	0.0456583	0.00840336	0.00943396	1
QC	Crops	215	United Republic of Tanzania	5312	Area harvested	249	Coconuts	2016	2016	ha	726305	Im	FAO data based on imputation methodology	0.0435569	0.00840336	0.00943396	1
QC	Crops	215	United Republic of Tanzania	5312	Area harvested	217	Cashew nuts, with shell	2016	2016	ha	547864	Im	FAO data based on imputation methodology	0.0328557	0.0420168	0.0471698	5
QC	Crops	215	United Republic of Tanzania	5312	Area harvested	486	Bananas	2016	2016	ha	460794	Im	FAO data based on imputation methodology	0.0276341	0.0168067	0.0188679	2
QC	Crops	215	United Republic of Tanzania	5312	Area harvested	79	Millet	2016	2016	ha	338322	Im	FAO data based on imputation methodology	0.0202894	0.0336134	0.0377358	4
QC	Crops	215	United Republic of Tanzania	5312	Area harvested	328	Seed cotton	2016	2016	ha	320000	*	Unofficial figure	0.0191906	0.00840336	0.00943396	1
QC	Crops	215	United Republic of Tanzania	5312	Area harvested	463	Vegetables, fresh nes	2016	2016	ha	306010	Im	FAO data based on imputation methodology	0.0183516	0	0	0
QC	Crops	215	United Republic of Tanzania	5312	Area harvested	489	Plantains and others	2016	2016	ha	296522	Im	FAO data based on imputation methodology	0.0177826	0	0	0
QC	Crops	215	United Republic of Tanzania	5312	Area harvested	197	Pigeon peas	2016	2016	ha	266115	Im	FAO data based on imputation methodology	0.0159591	0.0168067	0.0188679	2
QC	Crops	215	United Republic of Tanzania	5312	Area harvested	187	Peas, dry	2016	2016	ha	252320	Im	FAO data based on imputation methodology	0.0151318	0	0	0
QC	Crops	215	United Republic of Tanzania	5312	Area harvested	656	Coffee, green	2016	2016	ha	216876	Im	FAO data based on imputation methodology	0.0130062	0	0	0
QC	Crops	215	United Republic of Tanzania	5312	Area harvested	195	Cow peas, dry	2016	2016	ha	205687	Im	FAO data based on imputation methodology	0.0123352	0.142857	0.160377	17
QC	Crops	215	United Republic of Tanzania	5312	Area harvested	116	Potatoes	2016	2016	ha	182384	Im	FAO data based on imputation methodology	0.0109377	0.00840336	0.00943396	1
QC	Crops	215	United Republic of Tanzania	5312	Area harvested	191	Chick peas	2016	2016	ha	117217	Im	FAO data based on imputation methodology	0.00702957	0	0	0
QC	Crops	215	United Republic of Tanzania	5312	Area harvested	826	Tobacco, unmanufactured	2016	2016	ha	115565	Im	FAO data based on imputation methodology	0.0069305	0.00840336	0.00943396	1
QC	Crops	215	United Republic of Tanzania	5312	Area harvested	211	Pulses, nes	2016	2016	ha	110000	F	FAO estimate	0.00659676	0	0	0
QC	Crops	215	United Republic of Tanzania	5312	Area harvested	15	Wheat	2016	2016	ha	106931	Im	FAO data based on imputation methodology	0.00641271	0	0	0
QC	Crops	215	United Republic of Tanzania	5312	Area harvested	156	Sugar cane	2016	2016	ha	95662	Im	FAO data based on imputation methodology	0.0057369	0	0	0
QC	Crops	215	United Republic of Tanzania	5312	Area harvested	789	Sisal	2016	2016	ha	47561	Im	FAO data based on imputation methodology	0.00285226	0	0	0
QC	Crops	215	United Republic of Tanzania	5312	Area harvested	339	Oilseeds nes	2016	2016	ha	43679	Im	FAO data based on imputation methodology	0.00261945	0	0	0
QC	Crops	215	United Republic of Tanzania	5312	Area harvested	490	Oranges	2016	2016	ha	39983	Im	FAO data based on imputation methodology	0.0023978	0	0	0
QC	Crops	215	United Republic of Tanzania	5312	Area harvested	388	Tomatoes	2016	2016	ha	38067	Im	FAO data based on imputation methodology	0.0022829	0	0	0
QC	Crops	215	United Republic of Tanzania	5312	Area harvested	571	Mangoes, mangosteens, guavas	2016	2016	ha	33372	Im	FAO data based on imputation methodology	0.00200134	0.0168067	0.0188679	2
QC	Crops	215	United Republic of Tanzania	5312	Area harvested	619	Fruit, fresh nes	2016	2016	ha	31787	Im	FAO data based on imputation methodology	0.00190628	0	0	0
QC	Crops	215	United Republic of Tanzania	5312	Area harvested	280	Safflower seed	2016	2016	ha	27737	Im	FAO data based on imputation methodology	0.0016634	0	0	0
QC	Crops	215	United Republic of Tanzania	5312	Area harvested	108	Cereals, nes	2016	2016	ha	27504	Im	FAO data based on imputation methodology	0.00164943	0	0	0
QC	Crops	215	United Republic of Tanzania	5312	Area harvested	667	Tea	2016	2016	ha	20500	Im	FAO data based on imputation methodology	0.0012294	0	0	0
QC	Crops	215	United Republic of Tanzania	5312	Area harvested	89	Buckwheat	2016	2016	ha	20186	Im	FAO data based on imputation methodology	0.00121057	0	0	0
QC	Crops	215	United Republic of Tanzania	5312	Area harvested	603	Fruit, tropical fresh nes	2016	2016	ha	19575	Im	FAO data based on imputation methodology	0.00117392	0	0	0
QC	Crops	215	United Republic of Tanzania	5312	Area harvested	574	Pineapples	2016	2016	ha	17143	Im	FAO data based on imputation methodology	0.00102807	0	0	0
QC	Crops	215	United Republic of Tanzania	5312	Area harvested	403	Onions, dry	2016	2016	ha	17041	Im	FAO data based on imputation methodology	0.00102196	0	0	0
QC	Crops	215	United Republic of Tanzania	5312	Area harvested	512	Fruit, citrus nes	2016	2016	ha	15371	Im	FAO data based on imputation methodology	0.000921807	0	0	0
QC	Crops	215	United Republic of Tanzania	5312	Area harvested	446	Maize, green	2016	2016	ha	13812	Im	FAO data based on imputation methodology	0.000828313	0	0	0
QC	Crops	215	United Republic of Tanzania	5312	Area harvested	754	Pyrethrum, dried	2016	2016	ha	11950	Im	FAO data based on imputation methodology	0.000716648	0	0	0
QC	Crops	215	United Republic of Tanzania	5312	Area harvested	661	Cocoa, beans	2016	2016	ha	11775	Im	FAO data based on imputation methodology	0.000706153	0	0	0
QC	Crops	215	United Republic of Tanzania	5312	Area harvested	44	Barley	2016	2016	ha	8478	Im	FAO data based on imputation methodology	0.00050843	0	0	0
QC	Crops	215	United Republic of Tanzania	5312	Area harvested	698	Cloves	2016	2016	ha	7191	Im	FAO data based on imputation methodology	0.000431248	0	0	0
QC	Crops	215	United Republic of Tanzania	5312	Area harvested	358	Cabbages and other brassicas	2016	2016	ha	6618	Im	FAO data based on imputation methodology	0.000396885	0	0	0
QC	Crops	215	United Republic of Tanzania	5312	Area harvested	265	Castor oil seed	2016	2016	ha	6000	*	Unofficial figure	0.000359823	0	0	0
QC	Crops	215	United Republic of Tanzania	5312	Area harvested	234	Nuts, nes	2016	2016	ha	5681	Im	FAO data based on imputation methodology	0.000340693	0	0	0
QC	Crops	215	United Republic of Tanzania	5312	Area harvested	236	Soybeans	2016	2016	ha	5592	Im	FAO data based on imputation methodology	0.000335355	0	0	0
QC	Crops	215	United Republic of Tanzania	5312	Area harvested	254	Oil palm fruit	2016	2016	ha	5388	Im	FAO data based on imputation methodology	0.000323121	0	0	0
QC	Crops	215	United Republic of Tanzania	5312	Area harvested	417	Peas, green	2016	2016	ha	5233	Im	FAO data based on imputation methodology	0.000313826	0	0	0
QC	Crops	215	United Republic of Tanzania	5312	Area harvested	689	Chillies and peppers, dry	2016	2016	ha	3150	Im	FAO data based on imputation methodology	0.000188907	0	0	0
QC	Crops	215	United Republic of Tanzania	5312	Area harvested	497	Lemons and limes	2016	2016	ha	3101	Im	FAO data based on imputation methodology	0.000185969	0	0	0
QC	Crops	215	United Republic of Tanzania	5312	Area harvested	567	Watermelons	2016	2016	ha	2895	Im	FAO data based on imputation methodology	0.000173615	0	0	0
QC	Crops	215	United Republic of Tanzania	5312	Area harvested	420	Vegetables, leguminous nes	2016	2016	ha	2408	Im	FAO data based on imputation methodology	0.000144409	0	0	0
QC	Crops	215	United Republic of Tanzania	5312	Area harvested	137	Yams	2016	2016	ha	1712	Im	FAO data based on imputation methodology	0.00010267	0	0	0
QC	Crops	215	United Republic of Tanzania	5312	Area harvested	702	Nutmeg, mace and cardamoms	2016	2016	ha	1644	Im	FAO data based on imputation methodology	9.85916e-05	0	0	0
QC	Crops	215	United Republic of Tanzania	5312	Area harvested	406	Garlic	2016	2016	ha	1562	Im	FAO data based on imputation methodology	9.3674e-05	0	0	0
QC	Crops	215	United Republic of Tanzania	5312	Area harvested	711	Anise, badian, fennel, coriander	2016	2016	ha	1416	Im	FAO data based on imputation methodology	8.49183e-05	0	0	0
QC	Crops	215	United Republic of Tanzania	5312	Area harvested	560	Grapes	2016	2016	ha	1160	Im	FAO data based on imputation methodology	6.95658e-05	0	0	0
QC	Crops	215	United Republic of Tanzania	5312	Area harvested	414	Beans, green	2016	2016	ha	1061	Im	FAO data based on imputation methodology	6.36287e-05	0	0	0
QC	Crops	215	United Republic of Tanzania	5312	Area harvested	687	Pepper (piper spp.)	2016	2016	ha	1053	Im	FAO data based on imputation methodology	6.3149e-05	0	0	0
QC	Crops	215	United Republic of Tanzania	5312	Area harvested	149	Roots and tubers, nes	2016	2016	ha	1035	Im	FAO data based on imputation methodology	6.20695e-05	0	0	0
QC	Crops	215	United Republic of Tanzania	5312	Area harvested	521	Pears	2016	2016	ha	746	Im	FAO data based on imputation methodology	4.4738e-05	0	0	0
QC	Crops	215	United Republic of Tanzania	5312	Area harvested	536	Plums and sloes	2016	2016	ha	718	Im	FAO data based on imputation methodology	4.30588e-05	0	0	0
QC	Crops	215	United Republic of Tanzania	5312	Area harvested	401	Chillies and peppers, green	2016	2016	ha	620	Im	FAO data based on imputation methodology	3.71817e-05	0	0	0
QC	Crops	215	United Republic of Tanzania	5312	Area harvested	720	Ginger	2016	2016	ha	19	Im	FAO data based on imputation methodology	1.13944e-06	0	0	0
							Okra						No Data Available on FAOSTAT		0.00840336	0.00943396	1
							Pumpkin						No Data Available on FAOSTAT		0.00840336	0.00943396	1
					Total						16674854			1			21
QC	Crops	215	United Republic of Tanzania	5510	Production	56	Maize	2016	2016	tonnes	5916381	Im	FAO data based on imputation methodology
QC	Crops	215	United Republic of Tanzania	5510	Production	125	Cassava	2016	2016	tonnes	5384315	Im	FAO data based on imputation methodology
QC	Crops	215	United Republic of Tanzania	5510	Production	122	Sweet potatoes	2016	2016	tonnes	3843746	Im	FAO data based on imputation methodology
QC	Crops	215	United Republic of Tanzania	5510	Production	486	Bananas	2016	2016	tonnes	3563596	Im	FAO data based on imputation methodology
QC	Crops	215	United Republic of Tanzania	5510	Production	27	Rice, paddy	2016	2016	tonnes	3005924	Im	FAO data based on imputation methodology
QC	Crops	215	United Republic of Tanzania	5510	Production	156	Sugar cane	2016	2016	tonnes	2986250	Im	FAO data based on imputation methodology
QC	Crops	215	United Republic of Tanzania	5510	Production	463	Vegetables, fresh nes	2016	2016	tonnes	1773877	Im	FAO data based on imputation methodology
QC	Crops	215	United Republic of Tanzania	5510	Production	116	Potatoes	2016	2016	tonnes	1459230	Im	FAO data based on imputation methodology
QC	Crops	215	United Republic of Tanzania	5510	Production	176	Beans, dry	2016	2016	tonnes	1140605	Im	FAO data based on imputation methodology
QC	Crops	215	United Republic of Tanzania	5510	Production	289	Sesame seed	2016	2016	tonnes	943319	Im	FAO data based on imputation methodology
QC	Crops	215	United Republic of Tanzania	5510	Production	267	Sunflower seed	2016	2016	tonnes	890000	*	Unofficial figure
QC	Crops	215	United Republic of Tanzania	5510	Production	83	Sorghum	2016	2016	tonnes	760470	Im	FAO data based on imputation methodology
QC	Crops	215	United Republic of Tanzania	5510	Production	489	Plantains and others	2016	2016	tonnes	574187	Im	FAO data based on imputation methodology
QC	Crops	215	United Republic of Tanzania	5510	Production	249	Coconuts	2016	2016	tonnes	552539	Im	FAO data based on imputation methodology
QC	Crops	215	United Republic of Tanzania	5510	Production	242	Groundnuts, with shell	2016	2016	tonnes	550000	*	Unofficial figure
QC	Crops	215	United Republic of Tanzania	5510	Production	388	Tomatoes	2016	2016	tonnes	528034	Im	FAO data based on imputation methodology
QC	Crops	215	United Republic of Tanzania	5510	Production	490	Oranges	2016	2016	tonnes	465778	Im	FAO data based on imputation methodology
QC	Crops	215	United Republic of Tanzania	5510	Production	571	Mangoes, mangosteens, guavas	2016	2016	tonnes	427766	Im	FAO data based on imputation methodology
QC	Crops	215	United Republic of Tanzania	5510	Production	574	Pineapples	2016	2016	tonnes	417338	Im	FAO data based on imputation methodology
QC	Crops	215	United Republic of Tanzania	5510	Production	79	Millet	2016	2016	tonnes	313267	Im	FAO data based on imputation methodology
QC	Crops	215	United Republic of Tanzania	5510	Production	197	Pigeon peas	2016	2016	tonnes	271195	Im	FAO data based on imputation methodology
QC	Crops	215	United Republic of Tanzania	5510	Production	403	Onions, dry	2016	2016	tonnes	235651	Im	FAO data based on imputation methodology
QC	Crops	215	United Republic of Tanzania	5510	Production	619	Fruit, fresh nes	2016	2016	tonnes	202128	Im	FAO data based on imputation methodology
QC	Crops	215	United Republic of Tanzania	5510	Production	217	Cashew nuts, with shell	2016	2016	tonnes	193630	Im	FAO data based on imputation methodology
QC	Crops	215	United Republic of Tanzania	5510	Production	195	Cow peas, dry	2016	2016	tonnes	188157	Im	FAO data based on imputation methodology
QC	Crops	215	United Republic of Tanzania	5510	Production	328	Seed cotton	2016	2016	tonnes	181155	Im	FAO data based on imputation methodology
QC	Crops	215	United Republic of Tanzania	5510	Production	187	Peas, dry	2016	2016	tonnes	143358	Im	FAO data based on imputation methodology
QC	Crops	215	United Republic of Tanzania	5510	Production	211	Pulses, nes	2016	2016	tonnes	110000	F	FAO estimate
QC	Crops	215	United Republic of Tanzania	5510	Production	191	Chick peas	2016	2016	tonnes	105550	Im	FAO data based on imputation methodology
QC	Crops	215	United Republic of Tanzania	5510	Production	826	Tobacco, unmanufactured	2016	2016	tonnes	101407	Im	FAO data based on imputation methodology
QC	Crops	215	United Republic of Tanzania	5510	Production	15	Wheat	2016	2016	tonnes	96566	Im	FAO data based on imputation methodology
QC	Crops	215	United Republic of Tanzania	5510	Production	254	Oil palm fruit	2016	2016	tonnes	74770	Im	FAO data based on imputation methodology
QC	Crops	215	United Republic of Tanzania	5510	Production	358	Cabbages and other brassicas	2016	2016	tonnes	67845	Im	FAO data based on imputation methodology
QC	Crops	215	United Republic of Tanzania	5510	Production	656	Coffee, green	2016	2016	tonnes	52676	Im	FAO data based on imputation methodology
QC	Crops	215	United Republic of Tanzania	5510	Production	603	Fruit, tropical fresh nes	2016	2016	tonnes	50939	Im	FAO data based on imputation methodology
QC	Crops	215	United Republic of Tanzania	5510	Production	446	Maize, green	2016	2016	tonnes	49473	Im	FAO data based on imputation methodology
QC	Crops	215	United Republic of Tanzania	5510	Production	339	Oilseeds nes	2016	2016	tonnes	46060	Im	FAO data based on imputation methodology
QC	Crops	215	United Republic of Tanzania	5510	Production	512	Fruit, citrus nes	2016	2016	tonnes	45270	Im	FAO data based on imputation methodology
QC	Crops	215	United Republic of Tanzania	5510	Production	667	Tea	2016	2016	tonnes	36539	Im	FAO data based on imputation methodology
QC	Crops	215	United Republic of Tanzania	5510	Production	789	Sisal	2016	2016	tonnes	33915	Im	FAO data based on imputation methodology
QC	Crops	215	United Republic of Tanzania	5510	Production	234	Nuts, nes	2016	2016	tonnes	31262	Im	FAO data based on imputation methodology
QC	Crops	215	United Republic of Tanzania	5510	Production	108	Cereals, nes	2016	2016	tonnes	29560	Im	FAO data based on imputation methodology
QC	Crops	215	United Republic of Tanzania	5510	Production	567	Watermelons	2016	2016	tonnes	29180	Im	FAO data based on imputation methodology
QC	Crops	215	United Republic of Tanzania	5510	Production	89	Buckwheat	2016	2016	tonnes	20573	Im	FAO data based on imputation methodology
QC	Crops	215	United Republic of Tanzania	5510	Production	401	Chillies and peppers, green	2016	2016	tonnes	16459	Im	FAO data based on imputation methodology
QC	Crops	215	United Republic of Tanzania	5510	Production	497	Lemons and limes	2016	2016	tonnes	16092	Im	FAO data based on imputation methodology
QC	Crops	215	United Republic of Tanzania	5510	Production	44	Barley	2016	2016	tonnes	15322	Im	FAO data based on imputation methodology
QC	Crops	215	United Republic of Tanzania	5510	Production	280	Safflower seed	2016	2016	tonnes	14572	Im	FAO data based on imputation methodology
QC	Crops	215	United Republic of Tanzania	5510	Production	137	Yams	2016	2016	tonnes	10808	Im	FAO data based on imputation methodology
QC	Crops	215	United Republic of Tanzania	5510	Production	417	Peas, green	2016	2016	tonnes	9873	Im	FAO data based on imputation methodology
QC	Crops	215	United Republic of Tanzania	5510	Production	420	Vegetables, leguminous nes	2016	2016	tonnes	9607	Im	FAO data based on imputation methodology
QC	Crops	215	United Republic of Tanzania	5510	Production	821	Fibre crops nes	2016	2016	tonnes	9052	Im	FAO data based on imputation methodology
QC	Crops	215	United Republic of Tanzania	5510	Production	698	Cloves	2016	2016	tonnes	8910	Im	FAO data based on imputation methodology
QC	Crops	215	United Republic of Tanzania	5510	Production	661	Cocoa, beans	2016	2016	tonnes	8335	Im	FAO data based on imputation methodology
QC	Crops	215	United Republic of Tanzania	5510	Production	689	Chillies and peppers, dry	2016	2016	tonnes	7839	Im	FAO data based on imputation methodology
QC	Crops	215	United Republic of Tanzania	5510	Production	521	Pears	2016	2016	tonnes	5931	Im	FAO data based on imputation methodology
QC	Crops	215	United Republic of Tanzania	5510	Production	754	Pyrethrum, dried	2016	2016	tonnes	5776	Im	FAO data based on imputation methodology
QC	Crops	215	United Republic of Tanzania	5510	Production	236	Soybeans	2016	2016	tonnes	5704	Im	FAO data based on imputation methodology
QC	Crops	215	United Republic of Tanzania	5510	Production	406	Garlic	2016	2016	tonnes	5561	Im	FAO data based on imputation methodology
QC	Crops	215	United Republic of Tanzania	5510	Production	414	Beans, green	2016	2016	tonnes	5379	Im	FAO data based on imputation methodology
QC	Crops	215	United Republic of Tanzania	5510	Production	560	Grapes	2016	2016	tonnes	5192	Im	FAO data based on imputation methodology
QC	Crops	215	United Republic of Tanzania	5510	Production	536	Plums and sloes	2016	2016	tonnes	4684	Im	FAO data based on imputation methodology
QC	Crops	215	United Republic of Tanzania	5510	Production	265	Castor oil seed	2016	2016	tonnes	3000	*	Unofficial figure
QC	Crops	215	United Republic of Tanzania	5510	Production	149	Roots and tubers, nes	2016	2016	tonnes	2288	Im	FAO data based on imputation methodology
QC	Crops	215	United Republic of Tanzania	5510	Production	711	Anise, badian, fennel, coriander	2016	2016	tonnes	1329	Im	FAO data based on imputation methodology
QC	Crops	215	United Republic of Tanzania	5510	Production	702	Nutmeg, mace and cardamoms	2016	2016	tonnes	757	Im	FAO data based on imputation methodology
QC	Crops	215	United Republic of Tanzania	5510	Production	687	Pepper (piper spp.)	2016	2016	tonnes	496	Im	FAO data based on imputation methodology
QC	Crops	215	United Republic of Tanzania	5510	Production	720	Ginger	2016	2016	tonnes	45	Im	FAO data based on imputation methodology

## Sheet: Supp Table 4 Tz Maize Exp
Maize Exports	Downloaded from FAOSTAT on 30/05/2019
Domain Code	Domain	Area Code	Area	Element Code	Element	Item Code	Item	Year Code	Year	Unit	Value	Flag	Flag Description	Item	Year	Unit	Value	Flag Description
Maize Exports														Production
TP	Crops and livestock products	215	United Republic of Tanzania	5910	Export Quantity	56	Maize	2010	2010	tonnes	4385	*	Unofficial figure
TP	Crops and livestock products	215	United Republic of Tanzania	5910	Export Quantity	56	Maize	2011	2011	tonnes	7442	*	Unofficial figure
TP	Crops and livestock products	215	United Republic of Tanzania	5910	Export Quantity	56	Maize	2012	2012	tonnes	175302		Official data	Maize	2012	tonnes	5104248	Official data	0.0343
TP	Crops and livestock products	215	United Republic of Tanzania	5910	Export Quantity	56	Maize	2013	2013	tonnes	40449		Official data	Maize	2013	tonnes	5356350	Official data	0.0076
TP	Crops and livestock products	215	United Republic of Tanzania	5910	Export Quantity	56	Maize	2014	2014	tonnes	274428		Official data	Maize	2014	tonnes	6737197	Official data	0.0407
TP	Crops and livestock products	215	United Republic of Tanzania	5910	Export Quantity	56	Maize	2015	2015	tonnes	57764		Official data	Maize	2015	tonnes	5902776	Official data	0.0098
TP	Crops and livestock products	215	United Republic of Tanzania	5910	Export Quantity	56	Maize	2016	2016	tonnes	57802		Official data	Maize	2016	tonnes	5916381	FAO data based on imputation methodology	0.0098
																		Mean	0.02044
Sesame														Production
TP	Crops and livestock products	215	United Republic of Tanzania	5910	Export Quantity	289	Sesame seed	2010	2010	tonnes	65708	0	Official data	Sesame seed	2010	tonnes	144420	Official data	0.454979
TP	Crops and livestock products	215	United Republic of Tanzania	5910	Export Quantity	289	Sesame seed	2011	2011	tonnes	76017	0	Official data	Sesame seed	2011	tonnes	357162	Official data	0.212836
TP	Crops and livestock products	215	United Republic of Tanzania	5910	Export Quantity	289	Sesame seed	2012	2012	tonnes	76710	0	Official data	Sesame seed	2012	tonnes	456000	Official data	0.168224
TP	Crops and livestock products	215	United Republic of Tanzania	5910	Export Quantity	289	Sesame seed	2013	2013	tonnes	87727	0	Official data	Sesame seed	2013	tonnes	1050000	Unofficial figure	0.0835495
TP	Crops and livestock products	215	United Republic of Tanzania	5910	Export Quantity	289	Sesame seed	2014	2014	tonnes	116877	0	Official data	Sesame seed	2014	tonnes	1113982	Unofficial figure	0.104918
TP	Crops and livestock products	215	United Republic of Tanzania	5910	Export Quantity	289	Sesame seed	2015	2015	tonnes	135081	0	Official data	Sesame seed	2015	tonnes	1174589	Unofficial figure	0.115003
TP	Crops and livestock products	215	United Republic of Tanzania	5910	Export Quantity	289	Sesame seed	2016	2016	tonnes	133752	0	Official data	Sesame seed	2016	tonnes	943319	FAO data based on imputation methodology	0.141789
																		Mean	0.183043
